# Supplementary material
Source: PubMed Central journal article supplement (PMC5530658)
Supplement: pnas.1700286114.sapp.pdf [file pnas.1700286114.sapp.pdf]

## Supplementary Information Materials and Methods

### Bacterial strains and growth conditions

Bacterial strains and plasmids used in this study are listed in [SI Appendix, Table S3](#). *P. aeruginosa* strains were grown in or on tryptone soy broth (TSB), lysogeny broth (LB) or Vogel-Bonner medium (VBM) at either 25°C or 37°C with the addition of agar as required. *E. coli* strains were grown in or on LB, TSB, nutrient yeast broth NYB or terrific broth (TB) at 37°C with the addition of agar as required. Media was supplemented with antibiotics where appropriate, *P. aeruginosa*: streptomycin 2000 µg/ml, carbenicillin 50-300 µg/ml, irgasan 25 µg/ml, tetracycline 50-150 µg/ml and gentamycin 40-100 µg/ml or *E. coli*: streptomycin 50 µg/ml, ampicillin 50-100 µg/ml, tetracycline 15 µg/ml and kanamycin 50 µg/ml).

### DNA manipulation

DNA isolation was performed using the PureLink Genomic DNA mini kit (Life Technologies). Isolation of plasmid DNA was carried out using the QIAprep spin miniprep kit (Qiagen). Primers used are shown in [SI Appendix, Table S4](#) (Sigma). DNA fragments were amplified with either KOD Hot Start DNA Polymerase (Novagen) or standard Taq polymerase (NEB) as described by the manufacturer with the inclusion of Betaine (Sigma) or DMSO (Sigma). Restriction endonucleases were used according to the manufacturer's specifications (Roche). DNA sequencing was performed by GATC Biotech. *P. aeruginosa* deletion mutants were constructed as described previously using 500 bp homologous regions and confirmed with external primers ([SI Appendix, Table S4](#)) (1). *amrZ* (PA14\_20290) was amplified to construct a C-terminal V5 tag version (from pETDEST42 (Life Technologies)) and ligated into pMMB67HE. For protein purification *amrZ* was amplified and ligated into pET29a in frame with the sequence encoding a C-terminal His<sub>6</sub> tag. The DNA encoding the

C-terminus of VgrG4b (612-808 aa) was synthesised by Invitrogen GeneArt and subcloned into pET28a to construct pET28a-*vgrG4b*. For protein purification *hcp3* was amplified, digested and ligated into pET28a in frame with a His<sub>6</sub> tag. The coding regions of *tssB1*, *tssB2* and *tssB3* were amplified from *Pseudomonas* genomic DNA, *cfp* was amplified from pSEVA237C (de Lorenzo lab collection), 'superfolder' GFP (*sfgfp*) was amplified from mini-CTX-*gfp* (2) using KOD Hot Start DNA polymerase (Novagen). C-terminal fusions of each *tssB* gene with the respective fluorophore were generated by overlapping PCR (*cfp* and *sfgfp*) or by direct in-frame cloning (*venus*) in pME6032 (3).

### **Transposon mutagenesis and screening**

Transposon mutagenesis was performed using pBT20 as outlined in (4). Briefly PA14*tssB2tc::lacZ* and SM10 $\lambda$ *pir* pBT20 were grown overnight on LB plates, PA14 was then incubated at 43°C for 2 hr to inactivate the restriction system. Bacteria were collected, suspended, OD<sub>600</sub> measured and cells were mixed 1:2, spot plated on LB plates to enable conjugation and incubated. Cells were collected, re-suspended and diluted before being spread plated onto LB agar containing 5-bromo-4-chloro-3-indolyl  $\beta$ -D-galactopyranoside (X-Gal) (Invitrogen), irgasan and gentamycin plates and incubated up to 4 days. Individual colonies were monitored for increased or decreased X-gal colour development twice daily. Transposon mutants of interest were isolated, grown, spot plated and confirmed via galactosidase assay essentially as previously described (5). Transposon insertion sites were mapped via arbitrary PCR (4).

### **T6SS competition assays**

Competition assays were performed as per (6, 7) except that Top10 pRL662-*gfp* or DH5 $\alpha$  pCR2.1 were used as the prey strains. Briefly overnight cultures were mixed 1:1 and spotted

on LB agar plates for 5 hr. LB agar contained 1 mM IPTG or 1% Arabinose if induction of pAmrZ or pJN105*tssB2-cfp* was required. Spots were recovered, suspended, serially diluted and spotted on to LB, LB X-gal, LB gentamycin and/or PIA plates respectively to enable colony counts as required.

### **Secretion assays**

For secretion assays *P. aeruginosa* strains were grown overnight in TSB and subcultured to OD<sub>600</sub> 0.1 and grown at 37°C or 25°C for 6 or 24 hr, respectively (or as otherwise indicated) with agitation. Culture supernatants were prepared as previously described using trichloroacetic acid precipitation (8). An OD<sub>600</sub> equivalent of 0.1 or 1 of cell lysate and supernatant protein samples, respectively were loaded on to SDS-PAGE gels for analysis by western blotting.

### **Protein Purification**

BL21 Star ( $\lambda$ DE3) pAmrZ-His<sub>6</sub> cells were sub-cultured to an OD<sub>600</sub> 0.1 in one litre of NYB and grown at 37°C to an OD<sub>600</sub> 0.7 prior to induction with 1 mM IPTG for 5 hours. Cells were then harvested and frozen at -80°C. The frozen pellet was thawed on ice, suspended in 30 ml of buffer (20 mM Imidazole, 50 mM Tris, 500 mM NaCl) supplemented with cOmplete, EDTA-free protease inhibitor cocktail (Roche) and egg white lysozyme (Sigma) was added to 1 mg/ml and incubated for 45 min prior to probe sonication. The soluble fraction was separated by centrifugation at 18000g for 45 minutes at 4°C and then passed through a syringe driven 0.45  $\mu$ m filter. Clarified extract was applied to Ni<sup>2+</sup>-NTA columns (Hi-Trap, GE Healthcare) using an ÄKTA Prime. The column was washed with 10-15 column volumes of buffer before switching over to the elution buffer (500 mM Imidazole, 50 mM Tris, 500 mM NaCl). The sample was assessed for purity using SDS-PAGE gels and coomassie

staining and the band corresponding to AmrZ-His<sub>6</sub> confirmed with western blot analysis (See Fig. S10). The sample was then diluted into buffer (50 mM Tris, 500 mM NaCl) and quantification was performed using a Pierce BCA protein assay kit following the manufacturer's instructions and using BSA as standards. *E. coli* B834 (DE3) carrying pET28a-*vgrG4b*, along with *E. coli* BL21 (λDE3) harbouring pET28a-*hcp3* were grown in terrific broth, induced and harvested. The frozen pellet was suspended in buffer supplemented with cOmplete, EDTA-free protease inhibitor cocktail (Roche) prior to disruption by French press. Clarified extract was applied to Ni<sup>2+</sup>-NTA columns (Hi-Trap, GE Healthcare) using an ÄKTA Prime for purification.

### **Western blot analysis**

SDS-PAGE and western blotting were performed as described in (6). Briefly, proteins were resolved in 8% (VgrGs, RpoB), 12% (PldA, PldB, RpoB) or 15% (Hcps, TssBs and AmrZ) gels using the Mini-PROTEAN system (Bio-Rad) by electrophoresis and transferred to nitrocellulose membrane (GE Healthcare). Membranes were blocked in 5% milk (Sigma) in Tris-buffered saline pH 8 with 0.1% Tween-20 (TBST) prior to incubation with primary antibodies. Monoclonal antibodies were used at the following dilutions: anti-RNA polymerase (Biolegend) at 1:5000, anti-beta lactamase (Bla) (GeneTex International Corporation) at 1:1000 and anti-V5 (ThermoFisher) at 1:5000. Polyclonal primary antibodies described previously were used at a dilution of 1:1000. These include anti-Hcp1 (8), anti-Hcp2 (9), anti-TssB1 (10), anti-TssB2 (9), anti-VgrG2a and anti-VgrG2b (11). The polyclonal anti-VgrG4b and anti-Hcp3 antibodies were also used at 1:1000. Membranes were washed with TBST before incubation with HRP-conjugated secondary antibodies (Sigma) at a dilution of 1:5000. All monoclonal primary antibodies required anti-mouse secondary antibodies, whereas the polyclonal antibodies all required anti-rabbit secondary antibodies.

Signals were detected using the Novex ECL HRP Chemiluminescent substrate (ThermoFisher) or the Luminata Forte Western HRP substrate (Millipore) using a LAS-3000 Fuji Imager. ECL detection and a white light image of the ladder were taken on a Fuji LAS-3000, separately. Adobe Photoshop was used to adjust the brightness/contrast of the tiff images prior to overlaying and merging of the two layers using the multiply tool followed by merge layers.

### **Antibody Production**

Custom Anti-VgrG4b antibodies were raised against the purified C-terminus of VgrG4b (612-808) with Eurogentec following their immunisation protocols. Antibodies against purified full-length Hcp3 protein was raised similarly.

### **Electrophoretic mobility shift assays**

Electrophoretic mobility shift assays (EMSA) were performed as previously described (8, 9). Using the previous published controls (8, 9). Each reaction contained 40 mM NaCl, 4 mM Tris, 4 mM MgCl<sub>2</sub> (pH 8.0), 4% glycerol (W/V), 100 mg/ml BSA (non-specific protein control), 150 ng/μl poly-deoxy-inosinic-deoxy-cytidylic acid (d[(I-C)]) (Sigma) (non-specific DNA control), 5 nM <sup>32</sup>P-labeled DNA probe and purified AmrZ in the nM range. The 10 μl reactions were incubated at room temperature for 20 min prior to the addition of 2 μl of native loading dye and loading of the entire sample. Reactions were analysed on 4% (w/v) native polyacrylamide gels run at 200 V for 22 minutes prior to drying. Gels were visualised on a Typhoon FLA7000 Phosphorimager (GE Healthcare).

### **Real Time PCR**

Overnight cultures were subcultured in TSB, grown to early exponential phase and harvested in RNAlater (Ambion). RNA was isolated using TRIzol extraction and purified using the Qiagen RNeasy Mini kit (Qiagen) followed by DNase digestion using PureLink DNase Set (Invitrogen). Purified RNA was stored at  $-80^{\circ}\text{C}$  in nuclease-free water. cDNA was synthesised from 200 ng of RNA using SuperScript III Reverse Transcriptase (Invitrogen) and random hexamers (Applied Biosystems) according to the manufacturer's protocol. Real time PCR was performed with Fast SYBR Green Master Mix (Applied Biosystems) or KiCqStart SYBR Green qPCR ReadyMix (Sigma) on an Applied Biosystems StepOnePlus Real-Time PCR machine. The primers used for amplification are shown in [SI Appendix, Table S4](#). Real-time analysis was performed on RNA from three independent cultures in duplicate and quantification of *rpoD* gene expression served as an internal control. The relative expression ratios were calculated using the delta-delta method relative to PA14 wild-type or PA14*rsmA* pMMB as indicated.

### **Microscopy Procedure**

Strains for visualizing coexpression of multiple T6SS systems *in situ* were as follows: PA14*rsmA*, PA14*rsmA* H123 and PA14*rsmA* H13 A2tl (H2-) with combinations of fluorescent fusions pME6032*tssB1-venus*, pJN105*tssB2-cfp*, pJN105*tssB3-cfp* and/or pMMB67*tssB3-sfgfp* ([SI Appendix, Table S3, S4](#)). *P. aeruginosa* strains for microscopy were grown overnight in TSB with appropriate antibiotic(s) at  $37^{\circ}\text{C}$ , then diluted to an  $\text{OD}_{600} = 0.1$  in 10 ml fresh TSB plus appropriate antibiotic(s) and grown to  $\text{OD}_{600} = 0.3$  at  $25^{\circ}\text{C}$ . Plasmid expression was induced with IPTG (50  $\mu\text{g}/\text{ml}$ ) for strains containing pME6032 or pMMB67HE plasmids, or with arabinose (1%) for strains containing pJN105 plasmids. Cells growing exponentially ( $\text{OD}_{600} = 0.8-1.0$ ) were harvested by centrifugation (8000 *g*, 3 min) and resuspended in PBS to a final  $\text{OD}_{600}$  of 10 units. One microliter of resuspended culture

was spotted on a glass-bottomed dish (Ibidi 35 mm  $\mu$ -dish) and covered with a 1% PBS agarose pad. Cells were imaged using a Zeiss Axiovert 200 inverted microscope fitted with Hamamatsu Flash 4 (2048x2048 pixel) camera for fast low-light imaging, a pE4000 CoolLed Led Illumination source and a 100x 1.4 objective. A 500 nm LED was used to excite TssB1-Venus with an exposure time of 1000 ms using a YFP filter; a 435 nm LED was used to excite TssB2-CFP and TssB3-CFP with exposure times of 300 ms and 100 ms respectively using a CFP filter; and finally, a 500 nm LED was used to excite TssB3-sfGFP with an exposure time of 300 ms using a GFP filter. The LED and dichroic filter sets were selected based upon the spectral profiles for each fluorophore to ensure optimised excitation and emission settings were used for each of the relevant co-expressed fluorescent fusions.

### **Image analysis**

Microscopy images were analysed in Fiji (10). The Bleach Correction plugin was used on time-lapse image series (15). To determine the number of cells across all fields to be analysed the background was subtracted from brightfield DIC images using a filtered Gaussian blur image with Sigma (radius) = 20 and the 'Image Calculator' Fiji tool. Huang segmentation was then used within the 'Threshold' tool to select all the cells in each field, with the tool 'Analyse Particles' finally used to quantify the number of cells in each field. The range used for 'Analyse Particles' was set at 30-infinity pixels, to ensure that small areas of background brightfield particles (i.e. not cells) were excluded. The number of cells counted by this automated method was initially manually checked on a subset of images to ensure the process was a true reflection of the number of cells present in all subsequent analyses. The number of cells containing foci was then counted manually by using the 'Multi-Point' tool in Fiji. At least 10 separate randomly selected fields of view were analysed for each fluorescent fusion

in PA14*rsmA* which contained between 185 276 and 319 440 total cells or in PA14*rsmA* H123 or PA14*rsmA* H1H3 A2tl (H2-) which contained between 31 666 and 68 208 total cells.

### **Bioinformatics and statistical analysis**

DNA sequences were retrieved from the Pseudomonas Genome Database (16). Binding motifs were investigated using Mfold (17), FUZZNUC (EMBOSS) and BPROM. DNA and amino acid sequence searches were executed using SMART, InterPsoScan, Pfam and BLAST. Statistical analysis was performed using GraphPad Prism version 5 as indicated in the text.

### **Additional references**

1. Vasseur P, Vallet-Gely I, Soscia C, Genin S, & Filloux A (2005) The pel genes of the Pseudomonas aeruginosa PAK strain are involved at early and late stages of biofilm formation. *Microbiology* 151(Pt 3):985-997.
2. Hoang TT, Kutchma AJ, Becher A, & Schweizer HP (2000) Integration-proficient plasmids for Pseudomonas aeruginosa: site-specific integration and use for engineering of reporter and expression strains. *Plasmid* 43(1):59-72.
3. Valentini M, Laventie BJ, Moscoso JA, Jenal U, & Filloux A (2016) Correction: The Diguanilate Cyclase HsbD Intersects with the HptB Regulatory Cascade to Control Pseudomonas aeruginosa Biofilm and Motility. *PLoS genetics* 12(11):e1006473.
4. Kulasekara HD (2014) Transposon mutagenesis. *Methods in molecular biology (Clifton, N.J.)* 1149:501-519.



5. Miller JH (1992) *A short course in bacterial genetics: a laboratory manual and handbook for Escherichia coli and related bacteria* (Cold Spring Harbor Laboratory Press, Cold Spring Harbor, NY).
6. Hachani A, Allsopp LP, Oduko Y, & Filloux A (2014) The VgrG proteins are "A la carte" delivery systems for bacterial type VI effectors. *The Journal of biological chemistry*.
7. Hachani A, Lossi NS, & Filloux A (2013) A visual assay to monitor T6SS-mediated bacterial competition. *Journal of visualized experiments : JoVE* (73):e50103.
8. Jones CJ, *et al.* (2014) ChIP-Seq and RNA-Seq reveal an AmrZ-mediated mechanism for cyclic di-GMP synthesis and biofilm development by *Pseudomonas aeruginosa*. *PLoS pathogens* 10(3):e1003984.
9. Xu B & Wozniak DJ (2015) Development of a Novel Method for Analyzing *Pseudomonas aeruginosa* Twitching Motility and Its Application to Define the AmrZ Regulon. *PloS one* 10(8):e0136426.
10. Schindelin J, *et al.* (2012) Fiji: an open-source platform for biological-image analysis. *Nature methods* 9(7):676-682.
11. Miura K RC, Hiner M, Schindelin J, Rietdorf J. (2012) ImageJ Plugin CorrectBleach V2.0.2.
12. Winsor GL, *et al.* (2016) Enhanced annotations and features for comparing thousands of *Pseudomonas* genomes in the *Pseudomonas* genome database. *Nucleic acids research* 44(D1):D646-653.
13. Zuker M (2003) Mfold web server for nucleic acid folding and hybridization prediction. *Nucleic acids research* 31(13):3406-3415.

# H1-T6SS

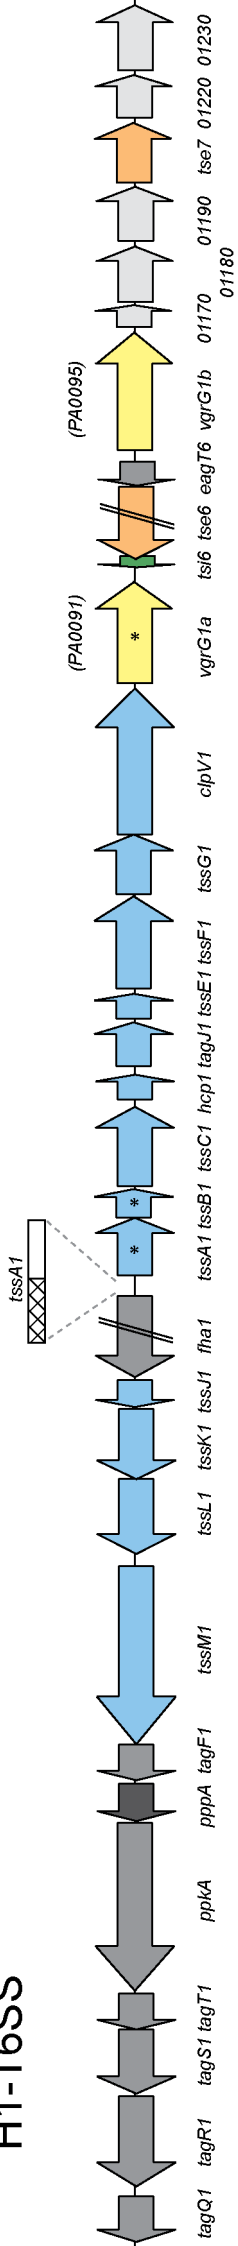

# H2-T6SS

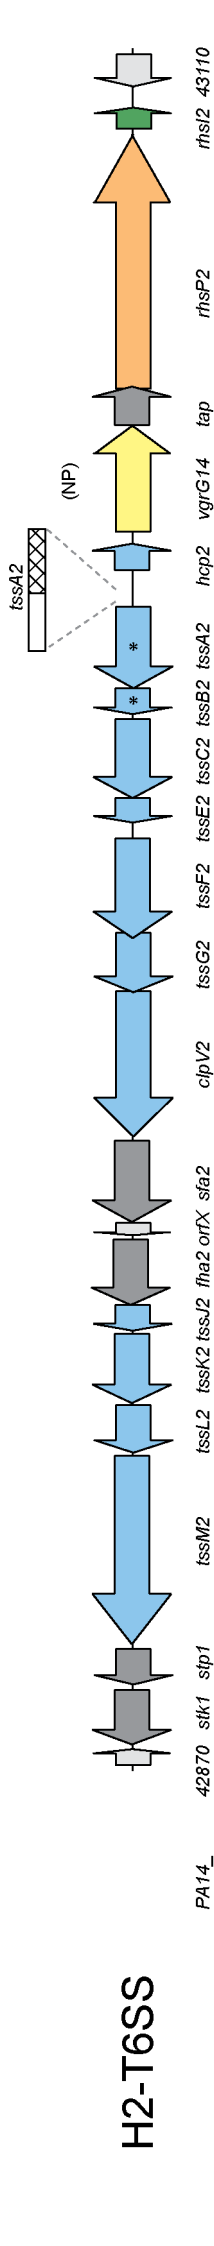

# H3-T6SS

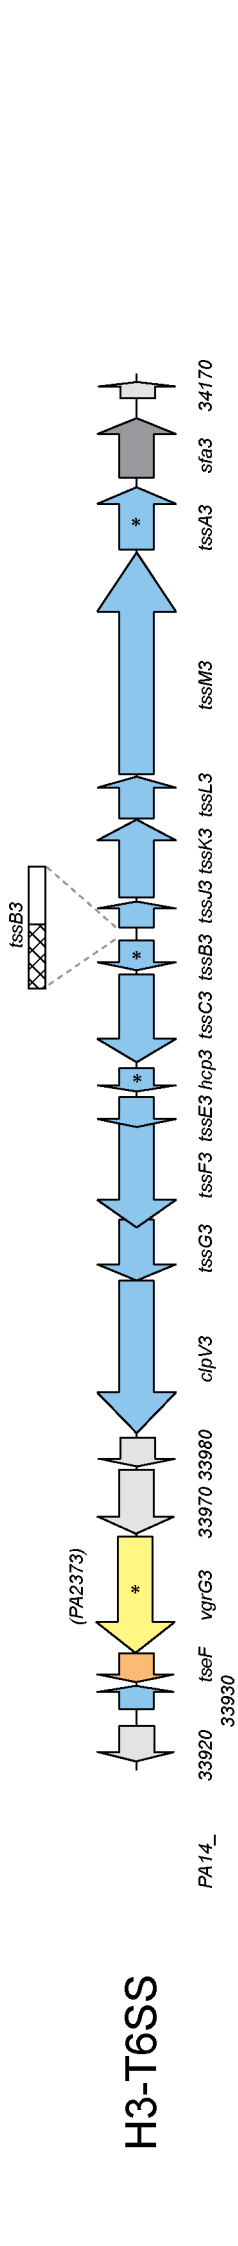

Figure S1

5 kb

A

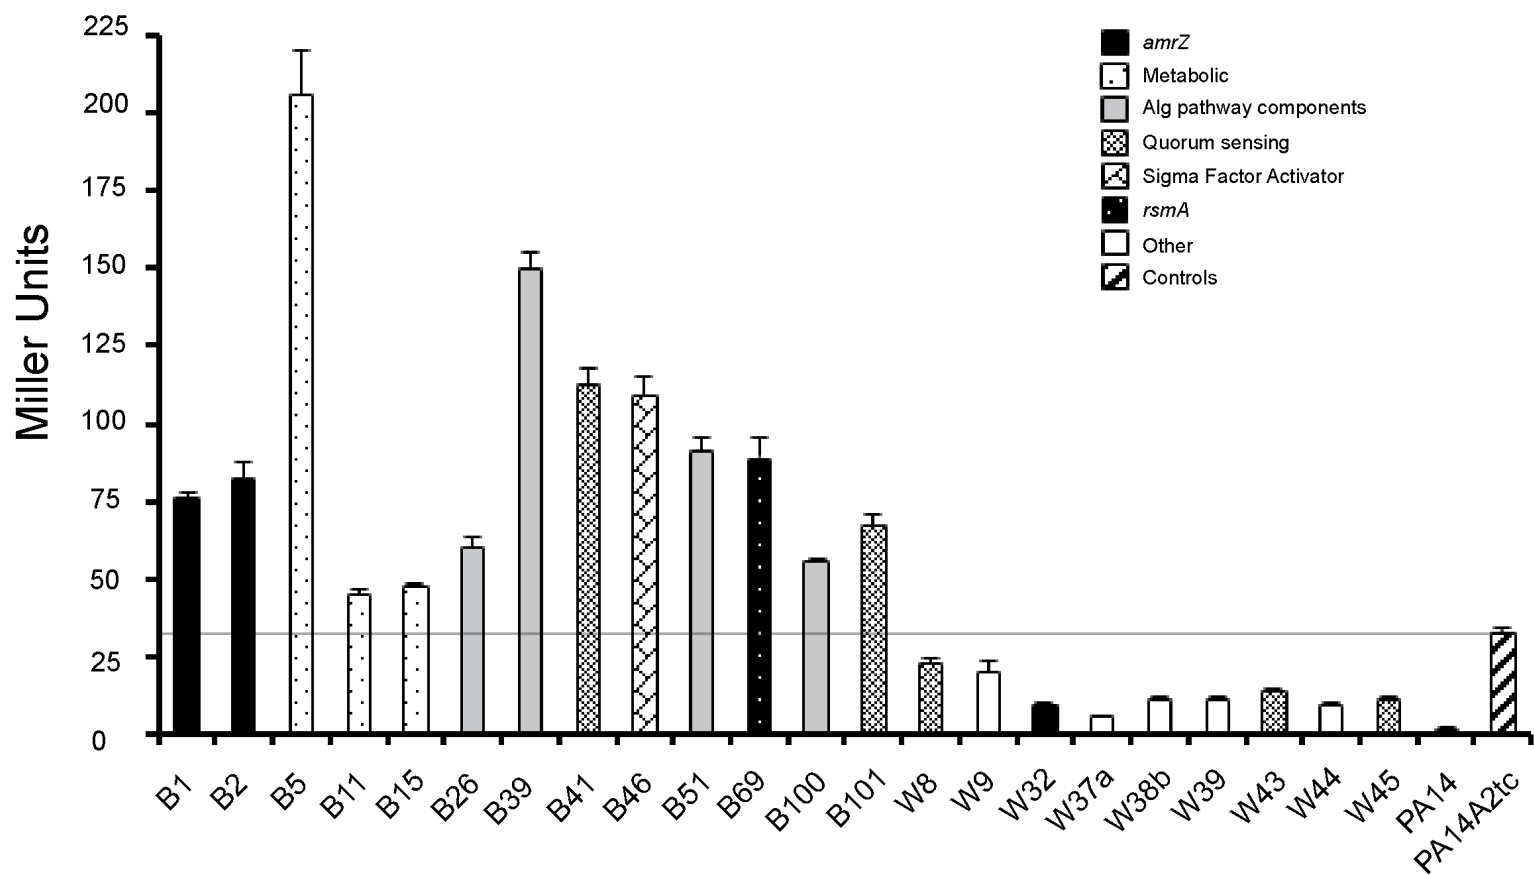

B

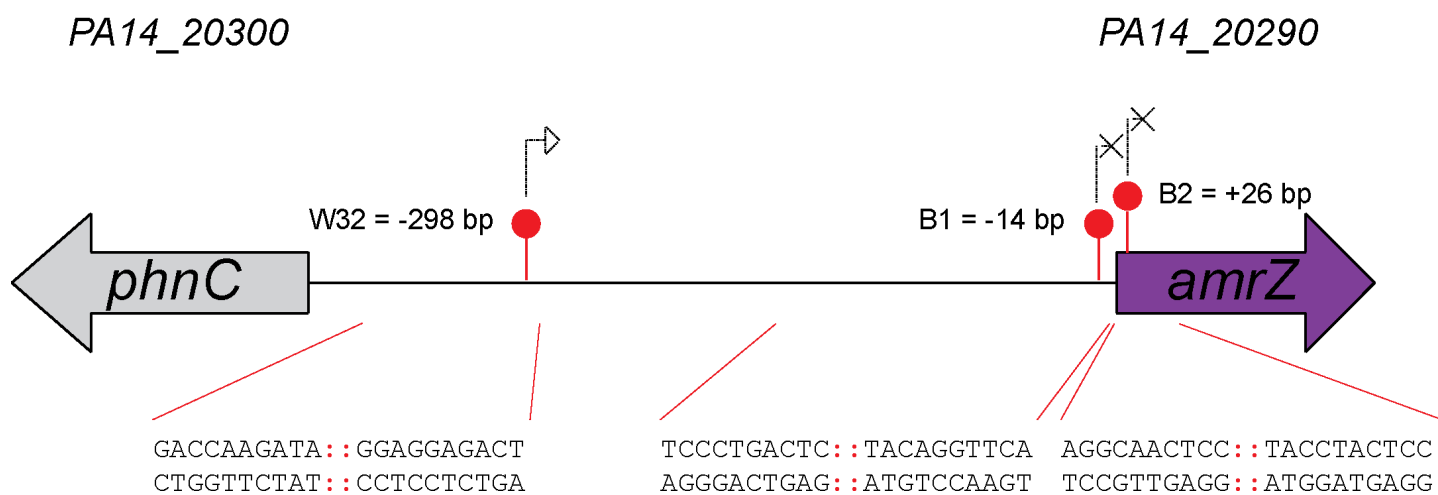

Figure S2

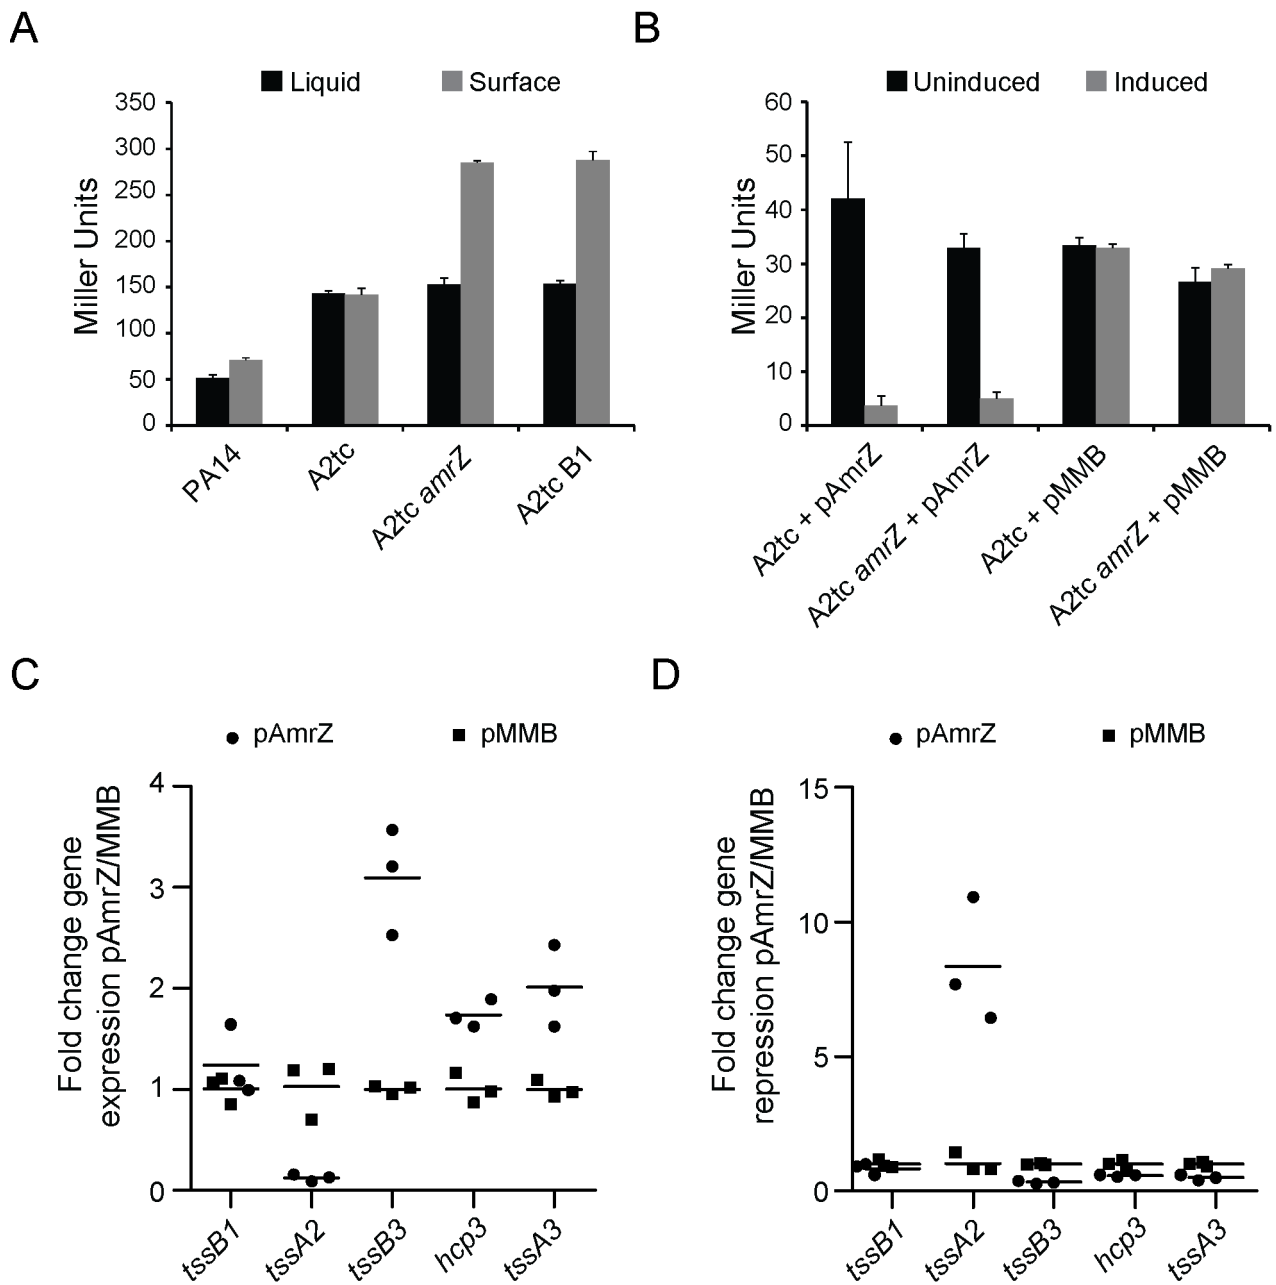

Figure S3

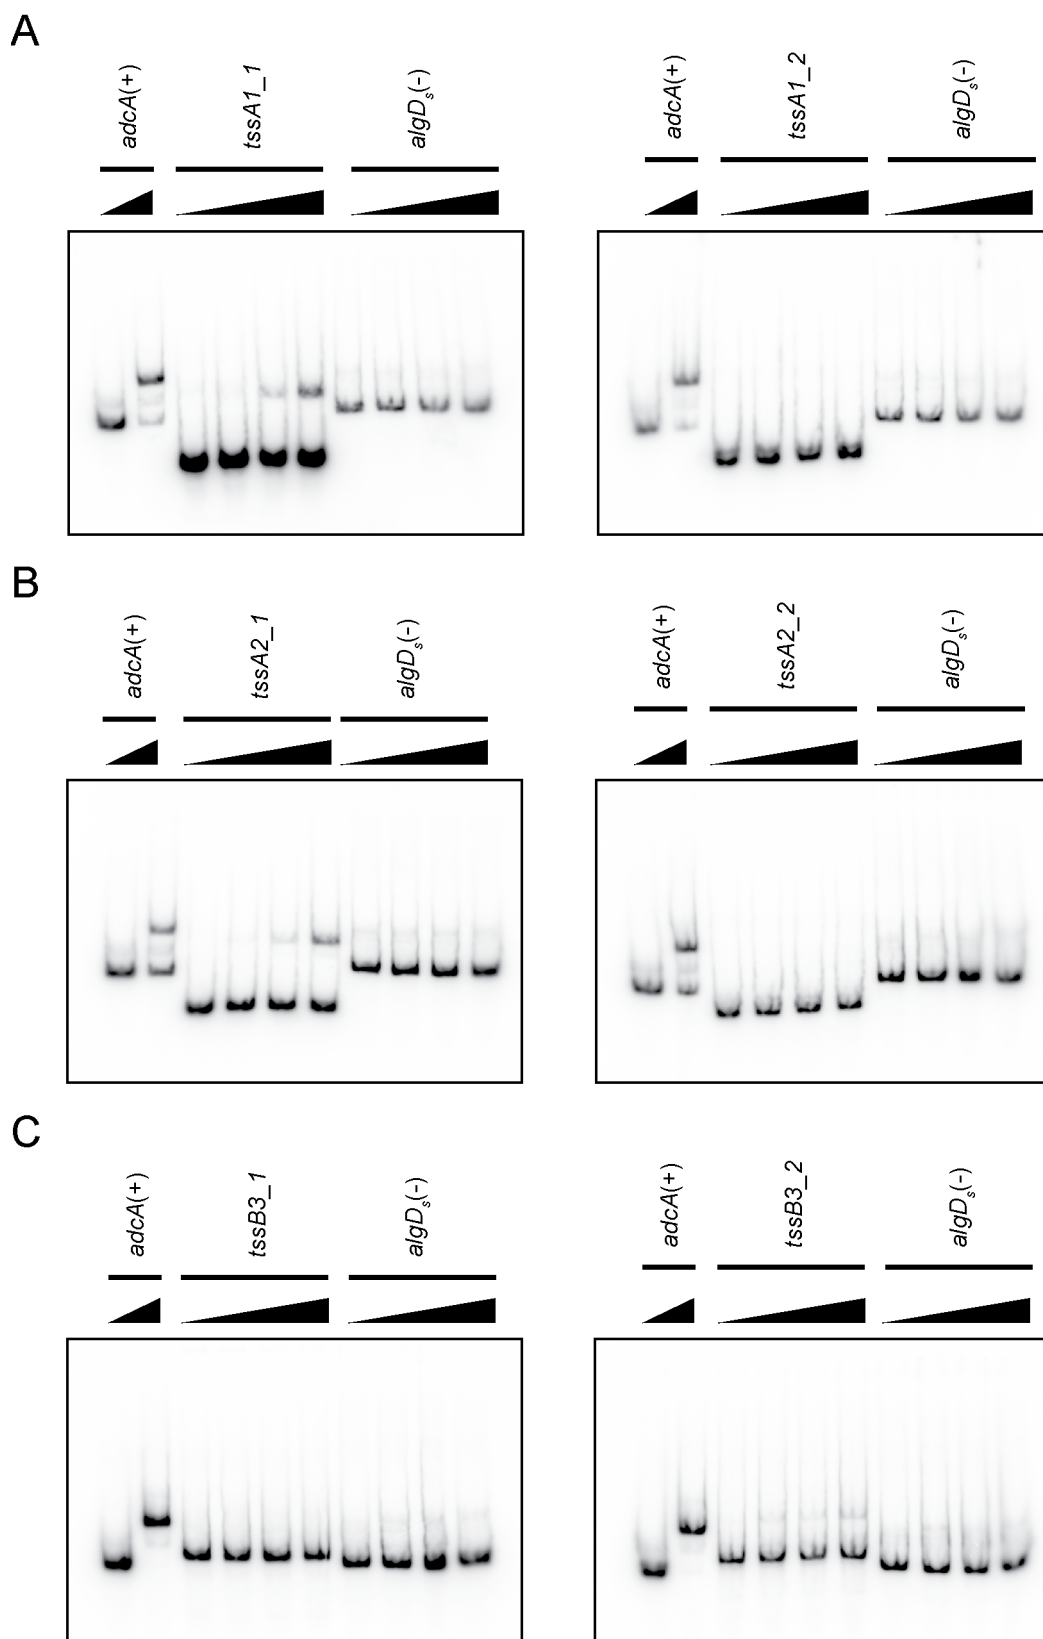

Figure S4

**A**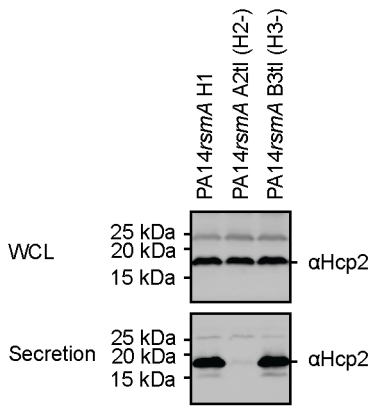**B**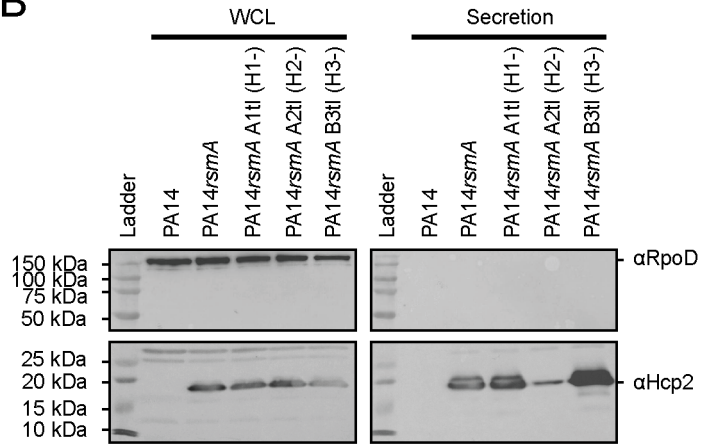**C**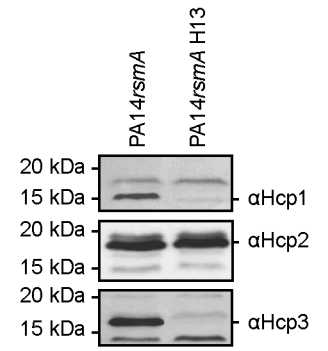**Figure S5**

**A**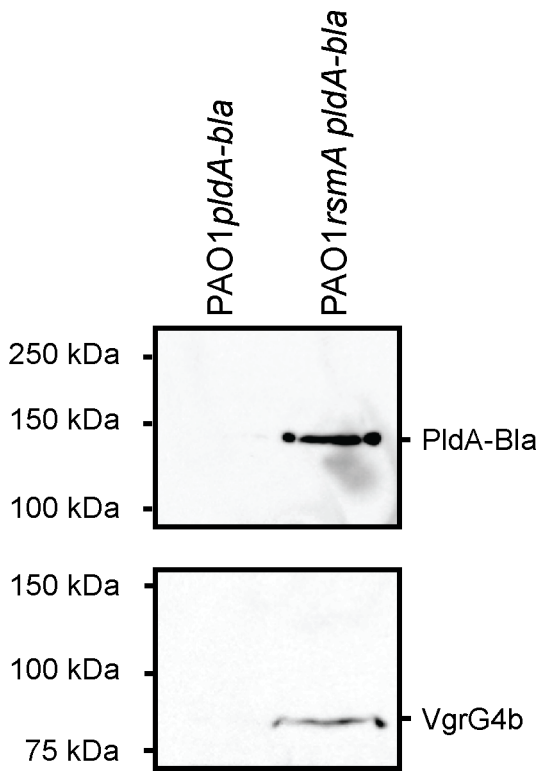**B**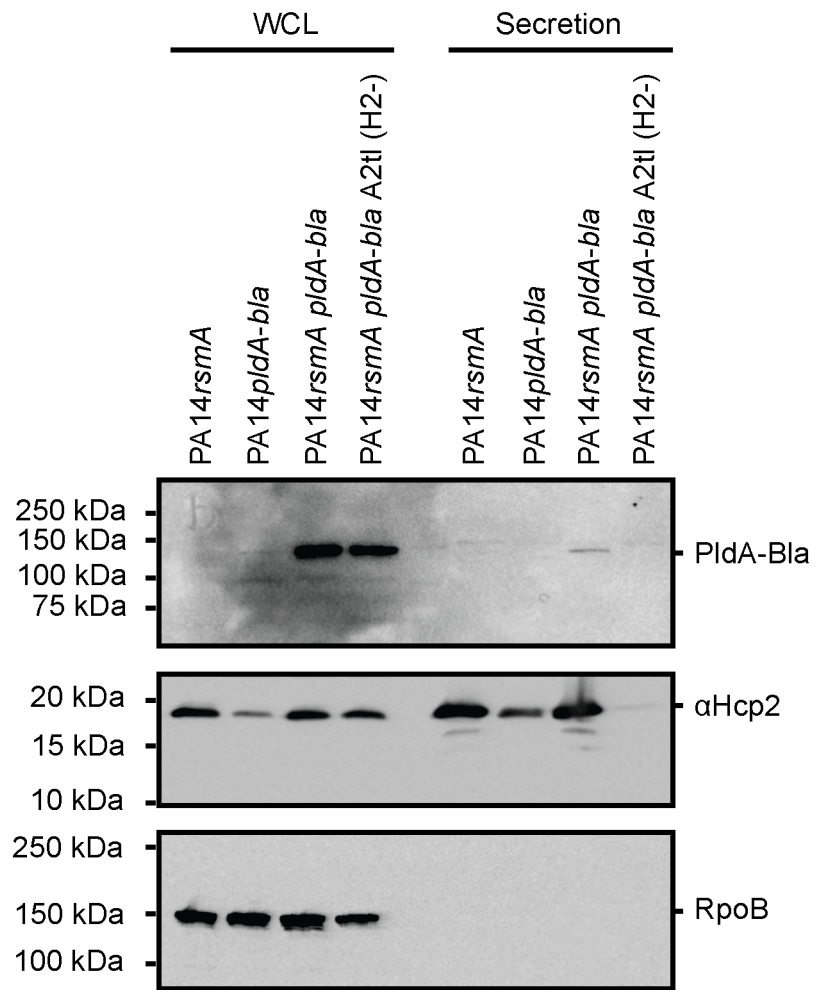

Figure S6

A

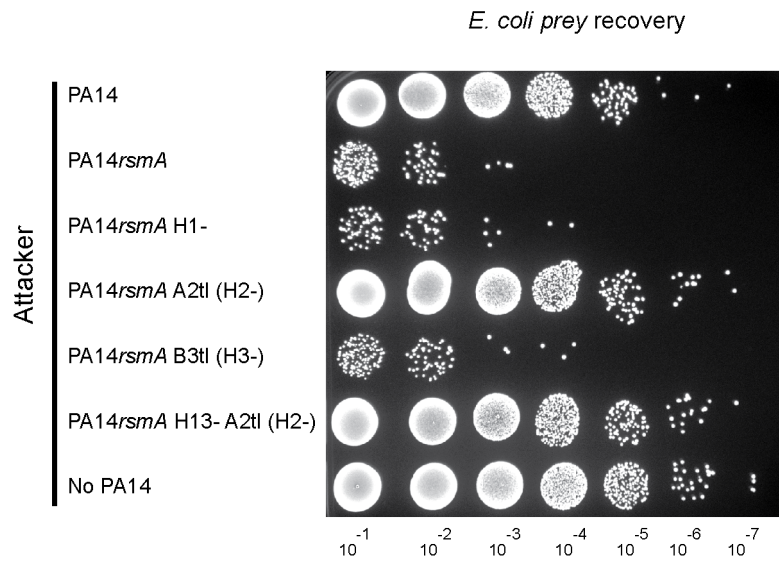

B

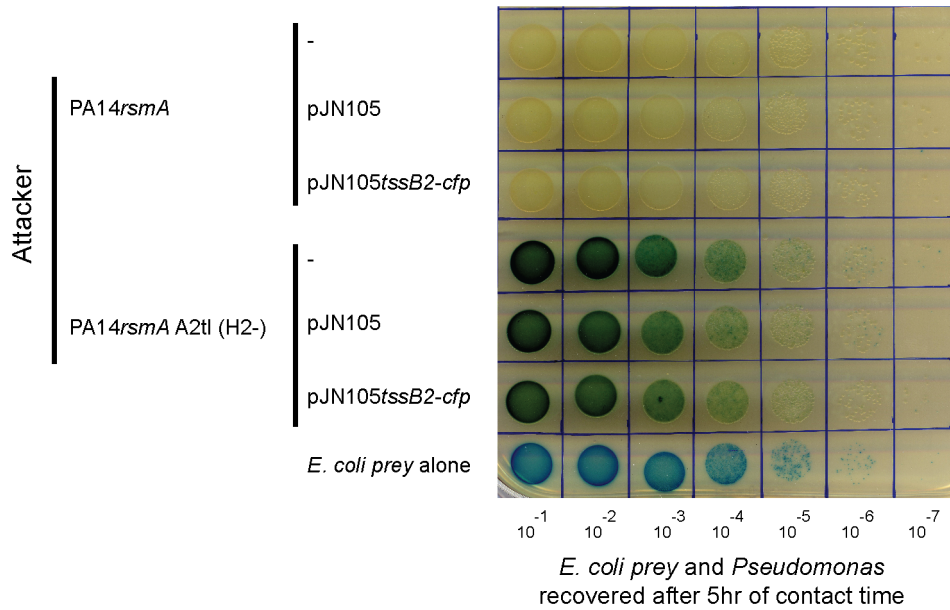

Figure S7



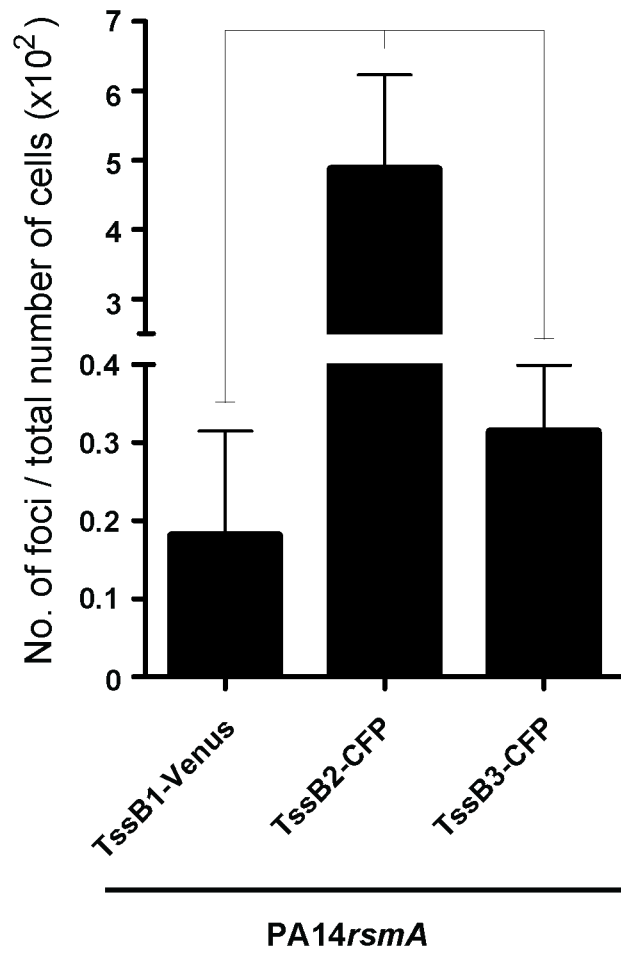

Figure S8

A

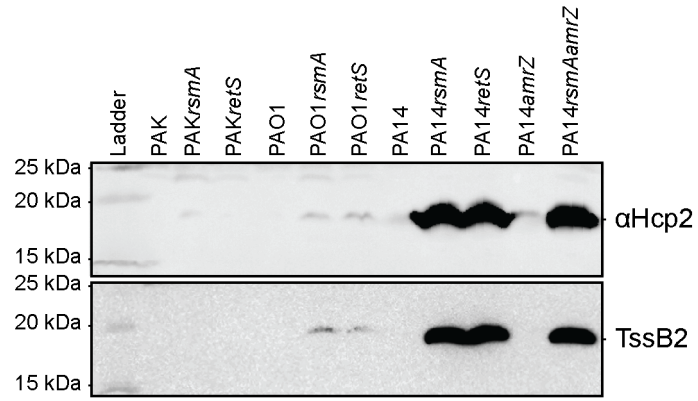

B

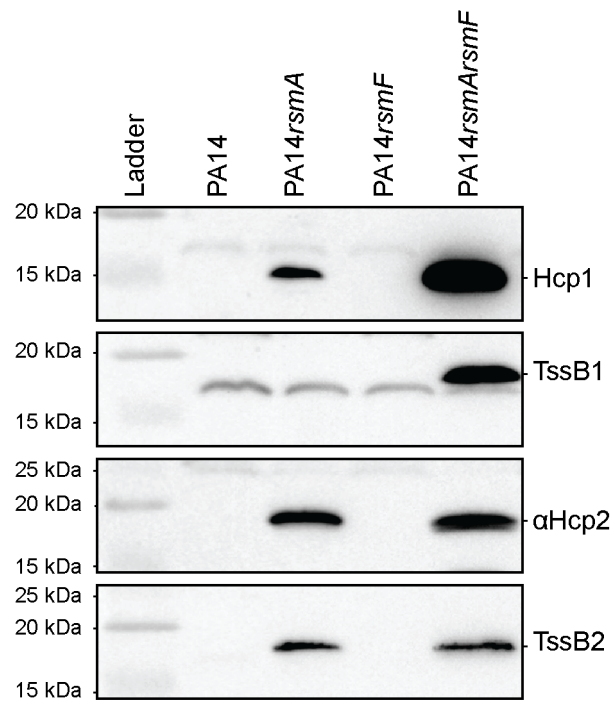

Figure S9

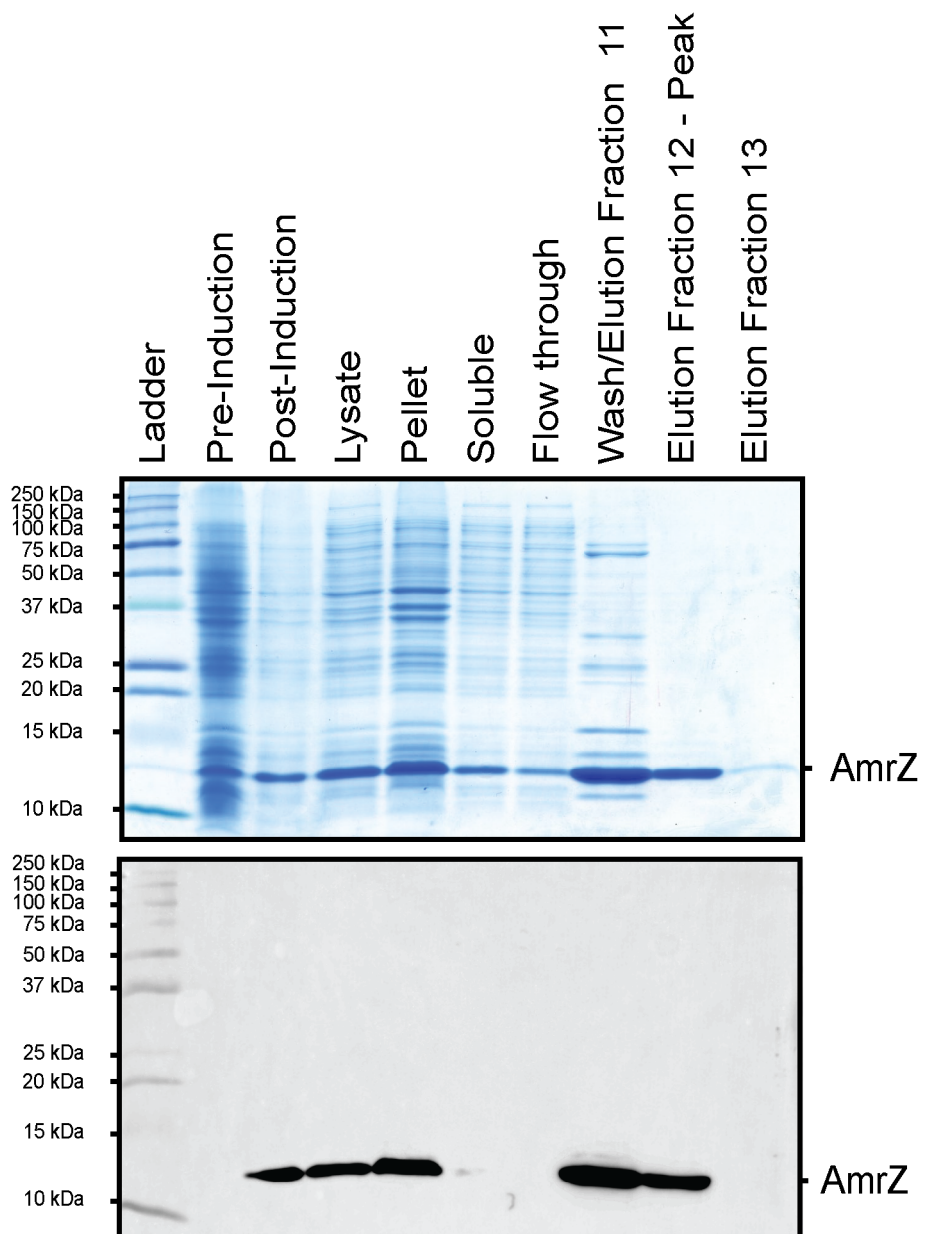

Figure S10

## Supplementary Figures Legends

**Fig. S1.** Schematic representation of *P. aeruginosa*'s T6SS and *vgrG* clusters from PA14. Gene names or numbers are indicated below each gene cluster. PAO1 gene numbers are indicated above each cluster for the *vgrG* encoding genes for reference (NP = not present). Colored genes indicated T6SS structural components (blue), *vgrGs* (yellow), toxin/immunity pairs (orange/green), other known T6SS genes (dark grey) and not currently associated with the T6SS in light grey. Genes checked via qRT-PCR are indicated by an asterisk. Schematic of upstream regions used for AmrZ binding assays are shown and hashed region indicates the sub-fragment bound by AmrZ.

**Fig. S2.** Expression of the H2-T6SS gene cluster in selected PA14 transposon mutants. (A) Level of  $\beta$ -galactosidase activity of the A2tc transcriptional fusion in selected mutants are shown. Mutants have been grouped as described in the key. (B) Location of transposon insertion in proximity to *amrZ* (*PA14\_20290*). Insertion mutants B1 (14 bp upstream of gene) and B2 (26 bp into gene), which may prevent AmrZ expression (indicated by dotted cross), resulted in increased expression of A2tc. In contrast, insertion mutant W32 (298 bp upstream of *amrZ*) which may increase read through of *amrZ* (indicated by dotted arrow) resulted in reduced expression of A2tc.

**Fig. S3.** AmrZ inversely regulates the H2- and H3-T6SS. (A) AmrZ is a negative regulator of the H2-T6SS. Deletion of *amrZ* relieves repression of *tssA2* when grown on agar plates. Beta-galactosidase assay was performed on PA14, PA14A2tc, PA14A2tc *armZ* and PA14A2tc B1 grown in either liquid LB or on LB plates. (B) Beta-galactosidase assay showing that overexpression of AmrZ represses transcription of *tssA2* (A2tc) which is absent in the uninduced or vector only (pMMB67HE). Strains were grown in liquid culture. (C) AmrZ represses the H2-T6SS (*tssA2*) but activates the H3-T6SS (*tssB3*, *hcp3* and *tssA3*). qRT-PCR was performed on PA14*rsmA* overexpressing *amrZ* (pAmrZ) and compared to vector control (pMMB). Scatter plot of fold change gene

expression with mean (N = 3). Statistical analysis was performed on the  $\Delta\Delta\text{CT}$  values (ANOVA Bonferroni post-test *tssB1*  $P > 0.05$ ,  $P < 0.05$  for all other genes). (D) Fold gene repression of data shown in C.

**Fig. S4. Dissection of AmrZ binding sites.** EMSA was performed using sub fragments of the DNA probes used in figure 3; (A) *tssA1\_1*, *tssA1\_2*, (B) *tssA2\_1*, *tssA2\_2* and (C) *tssB3\_1*, *tssB3\_2*. In all cases AmrZ only binds to one of the sub fragments from each upstream region. Each reaction contains 5 nM  $^{32}\text{P}$ -labelled DNA and increasing concentrations of purified AmrZ. In all cases, positive (*adcA*) or negative (*algD<sub>s</sub>*) controls were used as previously published (18, 19). See also Fig. S1 for schematic of AmrZ binding fragments used in this study.

**Fig. S5.** The H2-T6SS is functional in a *rsmA* mutant and Hcp2 depends upon this system for secretion. (A) Hcp2 is only faintly detectable when the H2-T6SS is disrupted (PA14*rsmA* A2tl (H2-)) but is still secreted when either the H1-T6SS is deleted (PA14*rsmA* H1-) or the H3-T6SS is disrupted (PA14*rsmA* B3tl (H3-)) after 5 h of growth from an  $\text{OD}_{600}$  of 0.1 at 37 degrees. (B) Hcp2 is drastically reduced when the H2-T6SS is disrupted (PA14*rsmA* A2tl (H2-)) but is still secreted when either the H1-T6SS is deleted (PA14*rsmA* H1-) or the H3-T6SS is disrupted (PA14*rsmA* B3tl (H3-)) after 8 h of growth from an  $\text{OD}_{600}$  of 0.1 at 37 degrees. RNA polymerase (RpoB) is used as a lysis control. (C) Deletion of the H1-T6SS cluster including *hcp1* and the H3-T6SS cluster including *hcp3* does not diminish the level of protein detected with the anti-Hcp2 antibody.

**Fig. S6.** PldA and VgrG4b are expressed in a *rsmA* mutant. (A) Western blot analysis using anti-TEM to detect PldA-Bla expression, or anti-VgrG4b shows enhanced expression of both proteins in PAO1*rsmA* at 25°C. (B) Deletion of *rsmA* enables PldA secretion. Western blot analysis using anti-TEM to detect PldA-Bla expression shows expression in a PA14*rsmA* mutant at 25°C and secretion in a H2-T6SS-dependent manner (A2tl (H2-)). Anti-RNA polymerase (RpoB) is used as a lysis control and anti-Hcp2 as a control for H2-T6SS activity.

**Fig. S7.** *P. aeruginosa* H2-T6SS dependent killing of *E. coli*. (A) Serial dilution of the 1:1 bacterial mix including *E. coli* GFP+ and the PA14 attackers as listed. *E. coli* is recovered significantly less when co-incubated with PA14*rsmA* as compared to PA14 and the killing is specifically H2-T6SS dependent as it is not alleviated in either the H1- or H3-T6SS mutants. (B) H2-T6SS killing assays demonstrating that the H2-T6SS is as functional in PA14*rsmA* as PA14*rsmA* carrying either pJN105 or pJN105*tssB2-cfp*. *P. aeruginosa* strains were mixed individually with *E. coli* DH5 $\alpha$  carrying pCR2.1 which expresses  $\beta$ -galactosidase. *Pseudomonas* strains were grown in the presence of arabinose 1% prior to the killing assay and arabinose 1% was included in the LB agar for the 5 h contact time to enable constant expression of TssB2-CFP. Recovered bacteria were diluted and spotted on X-gal plates. The level of blue color indicates survival of *E. coli* when the H2-T6SS is disabled (PA14*rsmA* A2tl).

**Fig. S8.** Significantly more H2-T6SS (TssB2-CFP) foci were observed than either H1-T6SS (TssB1-Venus) or H3-T6SS (TssB3-CFP) foci. Quantification of relative numbers of TssB1-Venus, TssB2-CFP and TssB3-CFP foci present in PA14*rsmA* after induction. Cells were grown at 25°C until the OD reached 0.3, at which point expression of the fluorescent fusions was induced by addition of IPTG or arabinose, with cells being harvested during mid-exponential phase and imaged directly. The mean number of foci per total PA14*rsmA* cells + SEM is represented based upon at least 40 separate fields

of view captured over two independent days. Total numbers of cells analysed were 284 985 for TssB1-Venus, 185 276 for TssB2-CFP and 319 440 for TssB3-CFP. Statistical analyses were performed using a one-way ANOVA with multiple comparisons (Tukey) comparing all 3 samples ( $P < 0.005$ ).

**Fig. S9.** Differential expression of T6SSs (A) Western blot analysis of regulator mutants showing higher levels of expression of H2-T6SS components in PA14 mutants compared to the same mutants in PAK or PAO1. Bacteria were grown at 37°C. (B) Western blot analysis showing that strong expression of the H1-T6SS components Hcp1 and TssB1 requires the double *rsmArsmF* mutant. H2-T6SS components have enhanced expression in an *rsmA* mutant but no additional expression was observed in the *rsmArsmF* mutant.

**Fig. S10.** Representative blot for the purification of AmrZ used in EMSAs. (A) Coomassie stained SDS-PAGE gel and (B) western blot using anti-His antibody to detect AmrZ-His<sub>6</sub>. Fraction 12 and 13 were used for EMSAs.

**Table S1.** Location of Transposon insertion in mutants with altered transcription of *tssA2tc*

**Table S2.** Identification of putative AmrZ binding sites upstream of *tssA1*, *tssA2* and *tssB3*

**Table S3.** Strain and Plasmid List

**Table S4. Primer List**



**Table S1: Location of Transposon insertion in mutants with altered transcription of *tssA2tc***

| Mutant code | Site of integration | Gene inserted into/near | PAO1          | Gene name              | Description                                                                                                                    |
|-------------|---------------------|-------------------------|---------------|------------------------|--------------------------------------------------------------------------------------------------------------------------------|
| B1          | 1747943             | PA14_20290/PA14_20300   | PA3385/PA3384 | <i>amrZ(algZ)/phnC</i> | Upstream of DNA binding protein (alginate and motility regulator Z), ABC phosphonate transporter ATP-binding protein           |
| B2          | 1747903             | PA14_20290              | PA3385        | <i>amrZ(algZ)</i>      | DNA binding protein (alginate and motility regulator Z)                                                                        |
| B5          | 5789115             | PA14_64940/PA14_64950   | PA4917/PA4918 | <i>pncA</i>            | NAD biosynthetic process/Nicotinamidase                                                                                        |
| B11         | 3920247             | PA14_44030              | PA1583        | <i>sdhA</i>            | Insertion in Succinate dehydrogenase (A subunit), effect likely on <i>sdhB</i> (B subunit)                                     |
| B15         | 3923546             | PA14_44070              | PA1580        | <i>gltA</i>            | Citrate synthase <i>cisY</i>                                                                                                   |
| B26         | 5143772             | PA14_57760              | PA4446        | <i>algW</i>            | AlgW protein, Alginate pathway                                                                                                 |
| B39         | 1469468             | PA14_17140              | PA3649        | <i>mucP</i>            | Putative membrane-associated zinc metalloprotease                                                                              |
| B41         | 7316                | PA14_00060              | PA0005        | <i>lptA</i>            | Putative acyltransferase (lysophosphatidic acid acyltransferase activity)                                                      |
| B46         | 3824444             | PA14_42990              | PA1661        | <i>tssG2</i>           | T6SS component of H2-T6SS, effect may be on PA14_42970 <i>sfa2</i>                                                             |
| B51         | 1470367             | PA14_17140              | PA3649        | <i>mucP</i>            | Putative membrane-associated zinc metalloprotease                                                                              |
| B69         | 4660539             | PA14_52570              | PA0905        | <i>rsmA</i>            | Regulator of secondary metabolism (carbon storage regulator)                                                                   |
| B100        | 4826929             | PA14_54430/PA14_54450   | PA0762/PA0761 | <i>algU/nadB</i>       | Sigma factor AlgU/AlgT/σ22 / L-aspartate oxidase                                                                               |
| B101        | 4085470             | PA14_45960              | PA1430        | <i>lasR</i>            | Transcriptional regulator LasR                                                                                                 |
| W8          | 1651112             | PA14_19120              | PA3477        | <i>rhIR(sdiA)</i>      | RhIR: sdiA acylhomoserine lactone dependent transcriptional regulator                                                          |
| W9          | 6310464             | PA14_70850              | PA5368        | <i>pstC</i>            | ABC transporter/permease                                                                                                       |
| W32         | 1748225             | PA14_20290/PA14_20300   | PA3385/PA3384 | <i>amrZ(algZ)/phnC</i> | Upstream of DNA binding protein (alginate and motility regulator Z), ABC phosphonate transporter ATP-binding protein           |
| W37a        | 3675920             | PA14_41200/PA14_41210   | PA1803/PA1804 | <i>lon/hupB</i>        | Lon protease/DNA-binding protein HU, effect likely on <i>hupB</i>                                                              |
| W38b        | 6263767             | PA14_70270              | PA5322        | <i>dut</i>             | Deoxyuridine 5'-triphosphate nucleotidohydrolase, effect likely on downstream gene AlgC                                        |
| W39         | 2022161             | PA14_23310              | PA3164        | unknown                | EPSP synthase/prephenate dehydrogenase                                                                                         |
| W43         | 4571514             | PA14_51430/PA14_51440   | PA0996/PA0995 | <i>pqsA/ogt</i>        | PqsA probable coenzyme A ligase/ methylated-DNA-protein-cysteine methyltransferase                                             |
| W44         | 5604286             | PA14_62810              | PA4747        | <i>secG</i>            | Preprotein translocase subunit SecG, effect on downstream gene(s) encoding tRNA or transcription elongation/initiation factors |
| W45         | 1651117             | PA14_19120              | PA3477        | <i>rhIR(sdiA)</i>      | RhIR: SdiA acylhomoserine lactone dependent transcriptional regulator                                                          |

**Table S2: Identification of putative AmrZ binding sites upstream of *tssA1*, *tssA2* and *tssB3***

| Gene         | Predicted AmrZ site? | Bp from ideal | 3' end relative to ATG (bp) | Strand relative to gene | Location                  | Putative Site CAAATTGCCATCA | In Sub fragment |
|--------------|----------------------|---------------|-----------------------------|-------------------------|---------------------------|-----------------------------|-----------------|
| <i>tssA1</i> | Yes                  | 5             | -156                        | -ve                     |                           | CACAACGCCACTA               | <i>tssA1_1</i>  |
| <i>tssA1</i> | Yes                  | 5             | -110                        | +ve                     | Overlapping predicted -35 | AATTTTGCCAACC               | <i>tssA1_2</i>  |
| <i>tssA1</i> | Yes                  | 5             | -86                         | +ve                     | Overlapping predicted -10 | CCGATATTCATCA               | <i>tssA1_2</i>  |
| <i>tssA2</i> | Yes                  | 1             | -265                        | +ve                     | Close to predicted -35    | CAAATGGCCATCA               | <i>tssA2_1</i>  |
| <i>tssA2</i> | Yes                  | 4             | -243                        | -ve                     | Overlapping predicted -10 | GCTATAGCCATCA               | <i>tssA2_2</i>  |
| <i>tssB3</i> | Yes                  | 4             | -436                        | -ve                     |                           | CCAATCGCGAGCA               | <i>tssA3_1</i>  |
| <i>tssB3</i> | Yes                  | 5             | -231                        | +ve                     | Close to predicted -35    | AGAATTTCCGACA               | <i>tssA3_2</i>  |

Note: Fragment in red text is bound by AmrZ in *SI appendix*, Fig. S4.

Table S3: Strain and Plasmid list

| Strain/Plasmid                 | Relevant Characteristics                                                                                                                                         |
|--------------------------------|------------------------------------------------------------------------------------------------------------------------------------------------------------------|
| <b>E. coli</b>                 |                                                                                                                                                                  |
| DH5α                           | <i>F' endA1 glnV44 thi-1 recA1 relA1 gyrA96 deoR nupG purB20 φ80dlacZΔM15 Δ(lacZYA-argF)U169, hsdR17 (r<sub>K</sub><sup>-</sup>m<sub>K</sub><sup>+</sup>), λ</i> |
| Top10                          | <i>F' mcrA Δ(mcr-hsdRMS-mcrBC) φ80lacZΔM15 ΔlacX74 nupG recA1 araD139 Δ(ara-leu)7697 galE15 galK16 rpsL(Str<sup>R</sup>)endA1 λ</i>                              |
| CC118λpir                      | Host strain for pKNG101 replication; Δ(ara leu) <i>araD ΔlacX74 galE galK -phoA</i> 20 thi-1 <i>rpsE rpoB argE</i> (Am) <i>recA</i> 1 Rfr λpir                   |
| SM10λpir                       | Host strain for pKNG101 replication; <i>thi-1 thr leu tonA lacY supE recA::RP4-2-Tc::Mu λpir</i> , KmR                                                           |
| BL21 Star (DE3)                | <i>F' ompT hsdS<sub>B</sub>(r<sub>B</sub><sup>-</sup> m<sub>B</sub><sup>-</sup>) gal dcm rne131</i> (λDE3)                                                       |
| B834 (λDE3)                    | <i>F' ompT hsdS<sub>B</sub>(r<sub>B</sub><sup>-</sup> m<sub>B</sub><sup>-</sup>) gal dcm met</i> (λDE3)                                                          |
| 1047                           | Host strain for pRK2013                                                                                                                                          |
| <b>P. aeruginosa</b>           |                                                                                                                                                                  |
| PA14                           | Wild type                                                                                                                                                        |
| PAO1                           | Wild type                                                                                                                                                        |
| PAK                            | Wild type                                                                                                                                                        |
| PA14 A1tl                      | PA14tssA1 : <i>lacZ</i> tl (tssA1 <i>lacZ</i> translational fusion (PA14_00990))                                                                                 |
| PA14 A2tc                      | PA14tssA2 : <i>lacZ</i> tc (tssA2 <i>lacZ</i> transcriptional fusion (PA14_43050))                                                                               |
| PA14 A2tl                      | PA14tssA2 : <i>lacZ</i> tl (tssA2 <i>lacZ</i> translational fusion (PA14_43050))                                                                                 |
| PA14 B3tl                      | PA14tssB3 : <i>lacZ</i> tl (tssB3 <i>lacZ</i> translational fusion (PA14_34070))                                                                                 |
| PA14 A1tl rsmA                 | PA14tssA1 : <i>lacZ</i> tl rsmA deletion mutant (Also referred to as PA14rsmA A1tl (H1-))                                                                        |
| PA14 A2tl rsmA                 | PA14tssA2 : <i>lacZ</i> tl rsmA deletion mutant (Also referred to as PA14rsmA A2tl (H2-))                                                                        |
| PA14 B3tl rsmA                 | PA14tssB3 : <i>lacZ</i> tl rsmA deletion mutant (Also referred to as PA14rsmA B3tl (H3-))                                                                        |
| PA14 A2tc amrZ                 | PA14tssA2 : <i>lacZ</i> tc amrZ deletion mutant                                                                                                                  |
| PA14rsmA                       | PA14rsmA (PA14_52570) deletion mutant                                                                                                                            |
| PA14amrZ                       | PA14amrZ (PA14_20290) deletion mutant                                                                                                                            |
| PA14rsmAamrZ                   | PA14rsmA (PA14_52570) and amrZ (PA14_20290) deletion mutant                                                                                                      |
| PA14rsmF                       | PA14rsmF (PA14_68470) deletion mutant                                                                                                                            |
| PA14rsmArsmF                   | PA14rsmA and rsmF deletion mutant                                                                                                                                |
| PA14rsmA H1-                   | PA14rsmA and H1-T6SS ( <i>tagQ1-vgrG1b</i> ) deletion mutant                                                                                                     |
| PA14rsmA H13-                  | PA14rsmA, deletion of H1-T6SS ( <i>tagQ1-vgrG1b</i> ) and H3-T6SS ( <i>tssB3-clpV3</i> )                                                                         |
| PA14rsmA H13- A2tl (H2-)       | PA14 rsmA A2tl, deletion of H1-T6SS ( <i>tagQ1-vgrG1b</i> ) and H3-T6SS ( <i>tssB3-clpV3</i> )                                                                   |
| PA14rsmA H123-                 | PA14rsmA, deletion of H1-T6SS ( <i>tagQ1-vgrG1b</i> ), H2-T6SS ( <i>tssA2-clpV2</i> ) and H3-T6SS ( <i>tssB3-clpV3</i> )                                         |
| PA14 hcp3v5                    | PA14 hcp3v5 (PA14_34030)                                                                                                                                         |
| PA14rsmA hcp3v5                | PA14rsmA hcp3v5                                                                                                                                                  |
| PA14rsmA hcp3v5 B3tl (H3-)     | PA14rsmA B3tl (H3-) hcp3v5                                                                                                                                       |
| PA14pldB-bla                   | PA14 <i>pldB</i> fusion with Bla Beta Lactamase                                                                                                                  |
| PA14rsmA pldB-bla              | PA14rsmA deletion mutant, <i>pldB</i> fusion with Bla Beta Lactamase                                                                                             |
| PA14 pldA-bla                  | PA14 <i>pldA</i> fusion with Bla Beta Lactamase                                                                                                                  |
| PA14rsmA pldA-bla              | PA14rsmA <i>pldA</i> fusion with Bla Beta Lactamase                                                                                                              |
| PA14rsmA pldA-bla A2tl (H2-)   | PA14rsmA <i>pldA</i> fusion with Bla Beta Lactamase                                                                                                              |
| PAO1rsmA                       | PAO1rsmA deletion mutant                                                                                                                                         |
| PAO1rsmA tssB2 (H2-)           | PAO1rsmA tssB2 (H2-) deletion mutant                                                                                                                             |
| PAO1 pldA-bla                  | PAO1 <i>pldA</i> fusion with Bla Beta Lactamase                                                                                                                  |
| PAO1rsmA pldA-bla              | PAO1rsmA <i>pldA</i> fusion with Bla Beta Lactamase                                                                                                              |
| PAO1rsmA pldA-bla tssB2 (H2-)  | PAO1rsmA tssB2 (H2-) <i>pldA</i> fusion with Bla Beta Lactamase                                                                                                  |
| PAO1rsmA pldA-bla vgrG4b       | PAO1rsmA <i>pldA</i> fusion with Bla Beta Lactamase, deletion of <i>vgrG4b</i> (PA3486)                                                                          |
| PAKrsmA                        | PAKrsmA deletion mutant                                                                                                                                          |
| PAKretS                        | PAKretS deletion mutant                                                                                                                                          |
| PAO1rsmA                       | PAO1rsmA deletion mutant                                                                                                                                         |
| PAO1retS                       | PAO1retS deletion mutant                                                                                                                                         |
| PA14retS                       | PA14rsmA deletion mutant                                                                                                                                         |
| <b>Plasmids</b>                |                                                                                                                                                                  |
| pCR-BluntII-TOPO               | Blunt cloning vector, ZeoR/KmR                                                                                                                                   |
| pKNG101                        | Suicide vector, <i>sacB</i> , StrR                                                                                                                               |
| pRK2013                        | Tra+, Mob+, KmR                                                                                                                                                  |
| pRL662-gfp                     | Broad host range vector derived from pBBR1MCS-5 expressing GFP, GmR                                                                                              |
| pBT20                          | For mariner transposon mutagenesis, GmR/AmpR                                                                                                                     |
| pKNG101-tssA1 : <i>lacZ</i> tl | tssA1 : <i>lacZ</i> tl (PA14_00990) translational fusion, StrR                                                                                                   |
| pKNG101-tssA2 : <i>lacZ</i> tc | tssA2 : <i>lacZ</i> tc (PA14_43050) transcriptional fusion, StrR                                                                                                 |
| pKNG101-tssA2 : <i>lacZ</i> tl | tssA2 : <i>lacZ</i> tl (PA14_43050) translational fusion, StrR                                                                                                   |
| pKNG101-tssB3 : <i>lacZ</i> tl | tssB3 : <i>lacZ</i> tl (PA14_34070) translational fusion, StrR                                                                                                   |
| pKNG101-rsmA                   | rsmA (PA14_52570) mutator, StrR                                                                                                                                  |
| pKNG101-amrZ                   | amrZ (PA14_20290) mutator, StrR                                                                                                                                  |
| pKNG101-pldA-bla               | <i>pldA</i> fusion with Bla Beta Lactamase, StrR                                                                                                                 |
| pKNG101-pldB-bla               | <i>pldB</i> fusion with Bla Beta Lactamase, StrR                                                                                                                 |
| pKNG101-H1-T6SS                | H1-T6SS (PA0070-PA0095) mutator, StrR                                                                                                                            |
| pKNG101-H2-T6SS                | H2-T6SS (PA1656-PA1662) mutator, StrR                                                                                                                            |
| pKNG101-tssB2                  | tssB2 (PA14_43040) mutator, StrR                                                                                                                                 |
| pKNG101-H3-T6SS                | H3-T6SS (PA2365-PA2371) mutator, StrR                                                                                                                            |
| pKNG101-retS                   | retS (PA14_64230) mutator, StrR                                                                                                                                  |
| pKNG101-hcp3v5                 | hcp3 (PA14_34030) mutator for addition of v5 tag, StrR                                                                                                           |
| pKNG101-vgrG4b                 | vgrG4b (PA3486) mutator, StrR                                                                                                                                    |
| pET28a                         | Expression vector, KmR                                                                                                                                           |
| pET28a-vgrG4b (612-808)        | Sequence encoding the C-terminus of <i>vgrG4b</i> (PA3486) was synthesised by Invitrogen GeneArt and subclone pET28a, KmR                                        |
| pET28a-hcp3                    | pET28a-hcp3 (PA2367) cloned in frame with a His6 tag, KmR                                                                                                        |
| pMMB67HE                       | Broad host range expression vector with <i>tac</i> promoter (MCS HindIII-EcoRI), AmpR                                                                            |
| pAmrZv5                        | pMME67HE-amrZ (PA14_20290) amplified with a V5 tag, AmpR                                                                                                         |
| pET29a                         | Expression vector, KmR                                                                                                                                           |
| pAmrZhis                       | pET29a-amrZ (PA14_20290) cloned in frame with a His6 tag, KmR                                                                                                    |
| pME6032::VenusC                | Broad host range expression vector, for fusion of Venus at C-terminus IPTG induction, TetR                                                                       |
| pME6032tssB1-venus             | Strain expressing TssB1-Venus (PA0083) under IPTG induction, TetR                                                                                                |
| pJN105                         | Broad host range expression vector, araC-PBAD cassette cloned in pBBR1MCS-5, GmR                                                                                 |
| pJN105tssB2-cfp                | Strain expressing TssB2-CFP (PA1657) under arabinose induction, GmR                                                                                              |
| pJN105tssB3-cfp                | Strain expressing TssB3-CFP (PA2365) under arabinose induction, GmR                                                                                              |
| pMMB67HEtssB3-sfgfp            | Strain expressing TssB3-GFP (PA2365) under IPTG induction, AmpR                                                                                                  |
| pSEVA237C                      | Cloning vector with pBBR1 ORI containing <i>cfp</i> coding region, KmR                                                                                           |
| mini-CTX-gfp                   | Plasmid for integration of <i>gfp</i> fusions into the <i>att</i> site of the <i>P. aeruginosa</i> chromosome, TetR                                              |
| pCR2.1                         | Constitutive expression of β-Galactosidase, self ligated, AmpR/KmR                                                                                               |

Table S4: Primer List

| Primer list                  | Name                      | Oligonucleotide Sequence (5'-3')                             | Description                                                                                        |
|------------------------------|---------------------------|--------------------------------------------------------------|----------------------------------------------------------------------------------------------------|
| <b>Fusions H1</b>            |                           |                                                              |                                                                                                    |
| OAL3541                      | tsaA1_Left_screening      | TGAGTAGTACACCCCGTCGG                                         | tsaA1_Left_screening (PA14_00990)                                                                  |
| OAL3542                      | tsaA1_R_Right F           | TGGTCTGGTCAAAAATAACTAGCGGGCCGCGGGCCAAAG                      | Right pool amplification of tsaA1 (PA14_00990) transcriptional/translational fusion                |
| OAL3543                      | tsaA1_R_Right R           | GGCGCCGGGGGGGGTCTTATGCTCCCTCATG                              | Right pool amplification of tsaA1 (PA14_00990) transcriptional/translational fusion                |
| OAL3544                      | tsaA1_right_screening     | TGGTCTGGTCCGGGGTGGTGG                                        | tsaA1_right_screening (PA14_00990)                                                                 |
| OAL3545                      | tsaA1_F_Left_U            | GGCGGGGATCGCTGGCGAGAGCCAGCTGTGG                              | Right pool amplification of tsaA1 (PA14_00990) translational fusion                                |
| OAL3546                      | tsaA1_L_Left_U            | GACGGCCAGTAACTCCGTAATATGTCAGGTCAGGATCTCCATATCATCG            | Right pool amplification of tsaA1 (PA14_00990) translational fusion                                |
| <b>Fusions H2</b>            |                           |                                                              |                                                                                                    |
| OAL1574                      | tsaA2_F_Left_Lc           | GGCGGGATCATCGGAGAGAGCGCTGACGTTGG                             | Left pool of 500 bp for tsaA2 (PA14_43050) transcriptional fusion: BamHI site for pKNG101          |
| OAL1575                      | tsaA2_R_Left_RBS_Lc       | TCATTATAATACCTCTAGTAGACAGAGATCCAGCTCCGGCCAGCAAA              | Left pool of 500 bp for tsaA2 (PA14_43050) replacement LacZ with 21 bases from the RBS region pQ50 |
| OAL1576                      | tsaA2_Left_screening_Lc   | TAGCTCTAAATCGTGTGG                                           | tsaA2_Left_screening_transcriptional fusion (PA14_43050)                                           |
| OAL1549                      | tsaA2_F_Right             | TGGTCTGGTCAAAAATAAGGCTCGCCCTCAATCTCAAGGAAGA                  | Right pool of 500 bp for tsaA2 (PA14_43050) replacement with LacZ                                  |
| OAL1550                      | tsaA2_R_Right             | GGCGGGGGCTCTGCTTCTTGGCTAGGGGGTGG                             | Right pool of 500 bp for tsaA2 (PA14_43050) replacement with LacZ: Small site                      |
| OAL1539                      | tsaA2_Right_screening     | CGATGATCGTCTGAGAAAT                                          | tsaA2_Right_screening (PA14_43050)                                                                 |
| OAL1546                      | tsaA2_F_Left              | GGCGGGATCTCATGCTCGTITTTGAATGA                                | Left pool of 500 bp for tsaA2 (PA14_43050) replacement with LacZ: BamHI site                       |
| OAL1548                      | tsaA2_R_Left              | GACGGCCAGTAACTCCGTAATATGTCAGGTCAGGATCTCCATATCATCG            | Left pool of 500 bp for tsaA2 (PA14_43050) replacement with LacZ                                   |
| OAL1538                      | tsaA2_Left_screening      | CTAAACAATCTCTGCGCAGTG                                        | tsaA2_Left_screening (PA14_43050)                                                                  |
| <b>Fusions H3</b>            |                           |                                                              |                                                                                                    |
| OAL1556                      | tsaB3_F_Right             | CATTACCGTTGGTCTGGTGTCAAAAATAACCTCTCCGGAGAAGCCGCC             | Right pool of 500 bp for tsaB3 (PA14_34070) replacement with LacZ                                  |
| OAL1557                      | tsaB3_R_Right             | GGCGGGGGCTCGTGGAACTGTTCACTGCTGA                              | Right pool of 500 bp for tsaB3 (PA14_34070) replacement with LacZ: Small site                      |
| OAL1552                      | tsaB3_Right_screening     | CCAGAGACTCTTGGAGTGG                                          | tsaB3_Right_screening (PA14_34070)                                                                 |
| OAL1553                      | tsaB3_F_Left              | GGCGGGATCATGCTGACCACTCGCATTTCC                               | Left pool of 500 bp for tsaB3 (PA14_34070) replacement with LacZ: BamHI site                       |
| OAL1555                      | tsaB3_R_Left              | GACGGCCAGTAACTCCGTAATATGTCAGGTCAGGATCTCCATATCATCG            | Left pool of 500 bp for tsaB3 (PA14_34070) replacement with LacZ                                   |
| OAL1551                      | tsaB3_Left_screening      | AATCCCTCGAATGGAATGCTG                                        | tsaB3_Left_screening (PA14_34070)                                                                  |
| <b>LacZ</b>                  |                           |                                                              |                                                                                                    |
| OAL1544                      | LacZ_ATG_F                | ATGACCATGATACCGGATTC                                         | Amplification of entire lacZ gene from mini-CTX-lacZ                                               |
| OAL1573                      | LacZ_ATG_F_RBSpQF50       | TCTAGTACGAGGATTAATAATGACCATGATACGGATTAC                      | Amplification of entire lacZ gene from mini-CTX-lacZ with RBSpQF50                                 |
| OAL1545                      | LacZ_Stop_R               | TTATTTTGAACACAGACC                                           | Amplification of entire lacZ gene from mini-CTX-lacZ                                               |
| OAL1540                      | lacZ_R_screening          | GTGGTGAAGCGGATTAAGT                                          | lacZ_R_screening                                                                                   |
| OAL1541                      | lacZATG+100-3             | GGGGGATGTCGCAAGGGATTAAG                                      | lacZATG+100-3 lacZ R screening                                                                     |
| OAL1542                      | lacZ_F_screening          | ACGGTTCCTATGGGGATT                                           | lacZ F screening                                                                                   |
| <b>Identification of Tn</b>  |                           |                                                              |                                                                                                    |
| OAL1795                      | Rnd1-ARB1-Pa-5'           | GGCCACGGCTCGACTGATACNNNNNNNNNAG                              | Round 1 arbitrary primers transposon identification                                                |
| OAL1796                      | Rnd1-ARB2-Pa-5'           | GGCCACGGCTCGACTGATACNNNNNNNNNAG                              | Round 1 arbitrary primers transposon identification                                                |
| OAL1797                      | Rnd1-ARB3-Pa-5'           | GGCCACGGCTCGACTGATACNNNNNNNNNAG                              | Round 1 arbitrary primers transposon identification                                                |
| OAL1798                      | Rnd1-ARB4-Pa-5'           | GGCCACGGCTCGACTGATACNNNNNNNNNAG                              | Round 1 arbitrary primers transposon identification                                                |
| OAL1799                      | Rnd1-TnM20                | TATAATGTGGAAATGTGACGGG                                       | BT20 transposon specific primer: Rnd1-TnM20 round 1 arbitrary primers                              |
| OAL1800                      | Rnd2-ARB                  | GGCCACGGCTCGACTGATAC                                         | Round 2 common primer which hybridizes in to round 1 round 2 arbitrary primers                     |
| OAL1801                      | Rnd2-TnM20                | ACAGGAACGACTCTAGAGG                                          | For pBT20 transposon                                                                               |
| <b>Gene Deletion rsmA</b>    |                           |                                                              |                                                                                                    |
| OAL2276                      | Primer 1 rsmA_F_Left      | ATATAGGCCCCCTCAAGTCTCGGGCCGATC                               | Primer 1 rsmA deletion mutant                                                                      |
| OAL2277                      | Primer 2 rsmA_R_Left      | TGACGCCGAATACAGATCTTCTCT                                     | Primer 2 rsmA deletion mutant                                                                      |
| OAL2278                      | Primer 3 rsmA_F_Right     | ATCTGATTCGCGGTCAACGCCCGCA                                    | Primer 3 rsmA deletion mutant                                                                      |
| OAL2279                      | Primer 4 rsmA_R_Right     | ATATACCGGGCAACTGATCTTCTGCTCG                                 | Primer 4 rsmA deletion mutant                                                                      |
| OAL2280                      | Primer 5 rsmA_F_Screen    | GTGAGTTCGCGCCAGTACAC                                         | Primer 5 screening for deletion mutant of rsmA                                                     |
| OAL2281                      | Primer 6 rsmA_R_Screen    | CTTCTGATTCGGGCACTCAGG                                        | Primer 6 screening for deletion mutant of rsmA                                                     |
| <b>Gene Deletion amrZ</b>    |                           |                                                              |                                                                                                    |
| OAL2335                      | Primer 1 amrZ_F_Left      | ATATAGGCCCCCGGGTGGTACAGGTTGAAGT                              | Primer 1 amrZ/algZ (PA14_20290) deletion mutant                                                    |
| OAL2336                      | Primer 2 amrZ_R_Left      | TCAGCCCTGGGGCGATCATGAC                                       | Primer 2 amrZ/algZ (PA14_20290) deletion mutant                                                    |
| OAL2337                      | Primer 3 amrZ_F_Right     | ATGCGCCACAGGGTGGAGCGGAG                                      | Primer 3 amrZ/algZ (PA14_20290) deletion mutant                                                    |
| OAL2338                      | Primer 4 amrZ_R_Right     | ATATACCGGGGGCGGACACTCAGATG                                   | Primer 4 amrZ/algZ (PA14_20290) deletion mutant                                                    |
| OAL2339                      | Primer 5 amrZ_F_Screen    | TGGGTCAGGGGGGGGGGATG                                         | Primer 5 screening for deletion mutant of amrZ/algZ (PA14_20290)                                   |
| OAL2340                      | Primer 6 amrZ_R_Screen    | CCGTAGCCGAGAGGTGTGTG                                         | Primer 6 screening for deletion mutant of amrZ/algZ (PA14_20290)                                   |
| <b>Gene Deletion rsmF</b>    |                           |                                                              |                                                                                                    |
| OAL2339                      | Primer 1 rsmF             | ATGATGGCCCGCTCGAGTGGAGCTGATTGAGGC                            | Primer 1 rsmF gene deletion                                                                        |
| OAL2340                      | Primer 2 rsmF             | CAACTCGTGAACCACTTCCGCGT                                      | Primer 2 rsmF gene deletion                                                                        |
| OAL2341                      | Primer 3 rsmF             | ATGGGTTTCAGAGGAGTGAAGACGGCAGC                                | Primer 3 rsmF gene deletion                                                                        |
| OAL2342                      | Primer 4 rsmF             | ATATCGATCTCAAGTGGTTCGGCCGCTG                                 | Primer 4 rsmF gene deletion                                                                        |
| OAL2343                      | Primer 5 rsmF             | GGCCGCACTGACAGAGATG                                          | Primer 5 screening for deletion mutant of rsmF                                                     |
| OAL2344                      | Primer 6 rsmF             | TGATGTCGCGCTTGTTC                                            | Primer 6 screening for deletion mutant of rsmF                                                     |
| <b>Gene Deletion H1-</b>     |                           |                                                              |                                                                                                    |
| OAL862                       | Primer 1 H1-T6SS          | ATGGTCAACGATCGAGCTGGAG                                       | Primer 1 deletion of H1-T6SS cluster (tagQ1-vgrG1b)                                                |
| OAL863                       | Primer 2 H1-T6SS          | TCAGTCTGAAGGCTGATGGCTGGCTG                                   | Primer 2 deletion of H1-T6SS cluster (tagQ1-vgrG1b)                                                |
| OAL864                       | Primer 3 H1-T6SS          | TCAGGCTCTGAAGTGGAGGCGGGCA                                    | Primer 3 deletion of H1-T6SS cluster (tagQ1-vgrG1b)                                                |
| OAL865                       | Primer 4 H1-T6SS          | GGTGGCTCAACAGTCTCAATGTC                                      | Primer 4 deletion of H1-T6SS cluster (tagQ1-vgrG1b)                                                |
| OAL866                       | Primer 5 H1-T6SS          | ATCAGCTGACCACTCGACGAC                                        | Primer 5 screening for deletion mutant of H1-T6SS cluster (tagQ1-vgrG1b)                           |
| OAL867                       | Primer 6 H1-T6SS          | AGAACGGCTTGAAGGGAAAGAACT                                     | Primer 6 screening for deletion mutant of H1-T6SS cluster (tagQ1-vgrG1b)                           |
| <b>Gene Deletion H2-</b>     |                           |                                                              |                                                                                                    |
| OAL996                       | Primer 1 H2-T6SS          | GACTGGTGAATCTCTGAAAC                                         | Primer 1 deletion of H2-T6SS cluster (tsaA2-clpV2)                                                 |
| OAL997                       | Primer 2 H2-T6SS          | TCAGGCAACGCTCTCTCTGGGGC                                      | Primer 2 deletion of H2-T6SS cluster (tsaA2-clpV2)                                                 |
| OAL998                       | Primer 3 H2-T6SS          | AGAGGCGCTTCTCGCTGAGTGGTGC                                    | Primer 1 deletion of H2-T6SS cluster (tsaA2-clpV2)                                                 |
| OAL999                       | Primer 4 H2-T6SS          | CAACACGGTATAGGGTTTGG                                         | Primer 1 deletion of H2-T6SS cluster (tsaA2-clpV2)                                                 |
| OAL1000                      | Primer 5 H2-T6SS          | GAATGTTAAGATATTCATGGGAC                                      | Primer 5 screening for deletion mutant of H2-T6SS cluster (tsaA2-clpV2)                            |
| OAL1001                      | Primer 6 H2-T6SS          | TCGAGCAGAGGGTCTCGCACTCCGG                                    | Primer 5 screening for deletion mutant of H2-T6SS cluster (tsaA2-clpV2)                            |
| <b>Gene Deletion H3-</b>     |                           |                                                              |                                                                                                    |
| OAL1002                      | Primer 1 H3-T6SS          | ATTTCCGATATGTTGAAACAT                                        | Primer 1 deletion of H3-T6SS cluster (tsaB3-clpV3)                                                 |
| OAL1003                      | Primer 2 H3-T6SS          | TGCTGATCAGAGCGGACTGACGAT                                     | Primer 2 deletion of H3-T6SS cluster (tsaB3-clpV3)                                                 |
| OAL1004                      | Primer 3 H3-T6SS          | CTGGCTCTGATCAGATCAACTCT                                      | Primer 3 deletion of H3-T6SS cluster (tsaB3-clpV3)                                                 |
| OAL1005                      | Primer 4 H3-T6SS          | TGTAATGACCAATAAATAGTCTA                                      | Primer 4 deletion of H3-T6SS cluster (tsaB3-clpV3)                                                 |
| OAL1006                      | Primer 5 H3-T6SS          | AACCTGCGGATGTCGGGGGATC                                       | Primer 5 screening for deletion mutant of H3-T6SS (tsaB3-clpV3)                                    |
| OAL1007                      | Primer 6 H3-T6SS          | CTGACAGTCTCCCTGGCTTAAAGCGG                                   | Primer 6 screening for deletion mutant of H3-T6SS (tsaB3-clpV3)                                    |
| <b>hcp3 VS fusion</b>        |                           |                                                              |                                                                                                    |
| OAL2784                      | Primer 1 Hcp3             | GTCAGTGGATGGATGGATCTTCTGATTTCCGGAGGACAT                      | Primer 1 VS insertion to Hcp3 in PA14                                                              |
| OAL2785                      | Primer 2 Hcp3             | GAGCAGGAGGAGAGGATAGGATAGGCTTACCTTGACCACTGGTGGCGG             | Primer 2 VS insertion to Hcp3 in PA14                                                              |
| OAL2786                      | Primer 3 Hcp3             | TATCCCTAACCTCTCTCGTCTGATCTACGTAGCGGGCGGCAAGCTC               | Primer 4 VS insertion to Hcp3 in PA14                                                              |
| OAL2787                      | Primer 4 Hcp3             | ATGGCGAAGCTGAGGAGCTGTTGGCTTGTGTCAGTAAAGGATAGGCGAGGATCAG      | Primer 4 VS insertion to Hcp3 in PA14                                                              |
| OAL2788                      | Primer 5 Hcp3             | AGGAAGCTGAGGCTGATG                                           | Primer 5 screening for VS insertion to Hcp3 in PA14                                                |
| OAL2789                      | Primer 6 Hcp3             | AACCTTCAGGAGAGCTCGAC                                         | Primer 6 screening for VS insertion to Hcp3 in PA14                                                |
| <b>Gene Deletion tssB2</b>   |                           |                                                              |                                                                                                    |
| OAL1596                      | Primer 1 tssB2_F_Left     | GGCGGGATCCGGATCAGGCTCCATGCTATG                               | Primer 1 tssB2 gene deletion                                                                       |
| OAL1597                      | Primer 2 tssB2_R_Left     | TCAGGCGCTTTGGCCATCGGTTTTTC                                   | Primer 2 tssB2 gene deletion                                                                       |
| OAL1598                      | Primer 3 tssB2_F_Right    | ATGGCCAAAGAGCGCTGAGCCACCTCT                                  | Primer 3 tssB2 gene deletion                                                                       |
| OAL1599                      | Primer 4 tssB2_R_Right    | GGCGGGGGCTCGGAGCACTATTGATGACG                                | Primer 4 tssB2 gene deletion                                                                       |
| OAL1594                      | Primer 5 tssB2_screening  | CAGCGATGGGGAAAGTCAAA                                         | Primer 5 screening for deletion mutant of tssB2                                                    |
| OAL1595                      | Primer 6 tssB2_screening  | TCTGCCACTTGGGCAATGC                                          | Primer 6 screening for deletion mutant of tssB2                                                    |
| <b>pIdA-bla fusion</b>       |                           |                                                              |                                                                                                    |
| OAL2618                      | pIdA 5' up                | ACCGACAGATCTAGCTGCA                                          | External of pIdA-Bla shuttle up                                                                    |
| OAL2619                      | Linker 5' up              | AAGCTGCGCAGAGGGGACGGCT                                       | pIdA w/o STOP + overhang vgrG2b-linker, R                                                          |
| OAL2614                      | Linker 3' up              | AGCCTGCGCTGCTGATG                                            | pIdA w/o STOP + overhang vgrG2b-linker, R                                                          |
| OAL2615                      | bla up 5'                 | CCCTTTTACCAGTCTTAATCAAGT                                     | bla + overhang downstream of pIdA, F                                                               |
| OAL2616                      | bla up 3'                 | CATTGGTAAAGGGTTTGTAGG                                        | bla + overhang downstream of pIdA, F                                                               |
| OAL2760                      | bla down 3'               | TCATGTGGATGTTCTTCCACCAATG                                    | bla & RBS of tIsa, R                                                                               |
| OAL2761                      | bla down 5'               | ATCGCACATGAAMAGGGTTTGTAT                                     | bla & RBS of tIsa, F                                                                               |
| OAL2899                      | tIsa down 3'              | TACCTTGGACTTTGGGATG                                          | Cloning whole tIsa after pIdA-Bla shuttle                                                          |
| OAL2900                      | tIsa external down 3'     | CAGATAAAGCCGATGGTGC                                          | External downstream of pIdA-Bla shuttle                                                            |
| <b>pIdB-bla fusion</b>       |                           |                                                              |                                                                                                    |
| OAL3206                      | Primer 1                  | CAAGATCGAGGCTCGAAG                                           | Primer 1 PIdB-Bla fusion                                                                           |
| OAL3212                      | Primer 2                  | GTCAAAATCTTAGCGTGGAGCGGCGGCGCTGGAA                           | Primer 2 PIdB-Bla fusion                                                                           |
| OAL3213                      | Primer 3                  | GCATGCTCAGTCCAGCGTACCAATGCTTAATCAG                           | Primer 3 PIdB-Bla fusion                                                                           |
| OAL3209                      | Primer 4                  | ACAGAGAGCGCCCAAGTGC                                          | Primer 4 PIdB-Bla fusion                                                                           |
| OAL3210                      | Primer 5                  | ATGACTGGCGGAAAGCGGG                                          | Primer 5 PIdB-Bla fusion                                                                           |
| OAL3211                      | Primer 6                  | ACGGCGGAGATGGCTTTT                                           | Primer 6 PIdB-Bla fusion                                                                           |
| OAL3247                      | Primer 7 pIdB-bla PA14    | CTTCAAGGCTGGCGGCTCCACCGTAAGATTTGAC                           | Primer 7 Primer to amplify upstream region for pIdB-bla PA14                                       |
| OAL3248                      | Primer 8 pIdB-bla PA14    | CTGATTAAGGCTGTGATAGCGGTGACTGAGGACTGC                         | Primer 8 Primer to amplify downstream region for pIdB-bla PA14                                     |
| <b>Gene Deletion vgrG4b</b>  |                           |                                                              |                                                                                                    |
| OAL800                       | Primer 1 VgrG4b           | CCACGCCACTGAGGTC                                             | Primer 1 vgrG4b gene deletion                                                                      |
| OAL801                       | Primer 2 VgrG4b           | CGCAGCAACTGTGAACACTGCTGTC                                    | Primer 2 vgrG4b gene deletion                                                                      |
| OAL802                       | Primer 3 VgrG4b           | ATGTTCAAGTCTGGTGGAAAGGCGACC                                  | Primer 3 vgrG4b gene deletion                                                                      |
| OAL803                       | Primer 4 VgrG4b           | ATAGCGATCGGGTGTCT                                            | Primer 4 vgrG4b gene deletion                                                                      |
| OAL804                       | Primer 5 VgrG4b           | GCCTACGCACTCTCTCGA                                           | Primer 5 screening for deletion mutant of vgrG4b                                                   |
| OAL805                       | Primer 6 VgrG4b           | GGCCTAGCAGGCTCAGGCTG                                         | Primer 6 screening for deletion mutant of vgrG4b                                                   |
| <b>Gene Deletion of retS</b> |                           |                                                              |                                                                                                    |
| OAL1893                      | Primer 1 retSLeIF         | GGCCGACTGTCCCTGATGATGACAAAGAGCGG                             | Primer 1 retS gene deletion                                                                        |
| OAL1894                      | Primer 2 retSLeIF         | TCAGGAGGCGCTACCCAGCGGAAGTCC                                  | Primer 2 retS gene deletion                                                                        |
| OAL1895                      | Primer 3 retSRightF       | GTGTACGGCTCTGAGGAGCGGAC                                      | Primer 3 retS gene deletion                                                                        |
| OAL1896                      | Primer 4 retSRightR       | CGCGCACTAGTGCATGCGTCTGGGCTG                                  | Primer 4 retS gene deletion                                                                        |
| OAL1897                      | Primer 5 retS Screening F | GAGGAGGCGAATGCTGCTGATG                                       | Primer 5 screening for deletion mutant of retS                                                     |
| OAL1898                      | Primer 6 retS Screening R | TGCTCAGCTGTGCGCTG                                            | Primer 6 screening for deletion mutant of retS                                                     |
| <b>AmrZ</b>                  |                           |                                                              |                                                                                                    |
| OAL2649                      | amrZ_F_pMM                | GCTAATCATAGTAAGGAGGAAATTAACCTGCGCCCACTGAAACGAACTCTACCT       | Forward primer RBS with XbaI site for cloning into pMMB67HE                                        |
| OAL2650                      | amrZ_R_pMM                | GCTAAGATCTCCAGTGAATCGAGCAGGAGAGGATAGGATACCGGCTGGCGCAGCTCCGCA | Reverse primer VS tag with BamHI site                                                              |
| <b>AmrZhis</b>               |                           |                                                              |                                                                                                    |
| OAL2807                      | AmrZ_F_his                | GTCATCATGCGCCCACTGAACAGGCAACTCTACT                           | Primer to amplify AmrZ and cut with NdeI for cloning into pET29a                                   |
| OAL2808                      | AmrZ_R_his                | ACTGACTCGAGTGGCGCGCGGCTGGCGCAGCTCCGCA                        | Primer to amplify AmrZ and cut with XhoI for cloning into pET29a                                   |
| <b>Hcp3his</b>               |                           |                                                              |                                                                                                    |
| OAL3577                      | hcp3_F_his                | GAGCATATGGATGATCACTTCTGATTC                                  | Primer to amplify hcp3 and cut with NdeI for cloning                                               |
| OAL3578                      | hcp3_R_his                | AAGATGACTCACTGACCAACTGGTGG                                   | Primer to amplify hcp3 and cut with BamHI for cloning                                              |
| <b>Primers for EMSA</b>      |                           |                                                              |                                                                                                    |
| OAL2979                      | algD111_EMSA              | CAACGGCCGGAATCTTCT                                           | algD, negative control AmrZ binding assay                                                          |
| OAL2980                      | algD112_EMSA              | TAGTTCGCTCAATGAAGTCAAG                                       | algD, negative control AmrZ binding assay                                                          |
| OAL2981                      | adaA_FAM_F_EMSA           | CGTACTGCTGCAACAAG                                            | PA4843 positive control AmrZ binding assay                                                         |
| OAL2982                      | adaA_R_EMSA               | GGCTTCTTCTGGCTCTC                                            | PA4843 positive control AmrZ binding assay                                                         |
| OAL2985                      | tsaA1_F                   | TCTTTAAAGATTTCCGATCTGC                                       | tsaA1F promoter region to test AmrZ binding                                                        |
| OAL2986                      | tsaA1_R                   | CTCACCTTCTGTTAAGATCC                                         | tsaA1F promoter region to test AmrZ binding                                                        |
| OAL2988                      | tsaA2_F                   | GGAACTCACTGTGCTGCTTAT                                        | tsaA2F promoter region to test AmrZ binding                                                        |

OAL2989 tssA2\_R CCCTCTTGGGAATTTCTCTATC  
 OAL3088 tssB3\_F CGACTCGTGAAGCTGCCCGGGG  
 OAL2991 tssB3\_R CCTCTGGTGGTCACTGGGGAC  
 OAL3091 algB6B CGCATCGAGCTTCTCTGA  
 OAL3092 algB6B TTCACTGCATTCGGCTCTGT  
 OAL3093 algD71 ACGCTGCTCTGCAAGTCATG  
 OAL3094 algD73 ACCAACTGATGGCTTCTCGG  
 OAL4016 tssA1amrZ75R TGCCGAAGGCTTCTCAA  
 OAL4017 tssA1amrZ93F TGCCCAAGAATTTTGCACAC  
 OAL4022 tssA2amrZ83R GCATCTGATGGCAATTTGGAA  
 OAL4023 tssA2amrZ110F GTTATATGGCTATAGCCAAGC  
 OAL4024 tssB3amrZ200R TGGATGTGCCGCCGCCGCA  
 OAL4025 tssB3amrZ200F GGGTACGCGCTGCAACTGAC  
**RT PCR**  
 OAL2134 vgrG2a F TTGACACCGTTCATGA  
 OAL2135 vgrG2a R GTCATCAGTTGACACACC  
 OAL536 vgrG2b F GGAGCCGGGAAGCACTT  
 OAL537 vgrG2b R AGGCTTCCCGAATCTGTT  
 OAL3042 vgrG6 F GGCATTGGTCGAGAGAAAC  
 OAL3043 vgrG6 R TCAGTGGCGATCGTTTT  
 OAL3030 vgrG5 F AGCCTATCCCGCAGAGAT  
 OAL3031 vgrG5 R CGTAGAGCGATACGGTTG  
 OAL3034 vgrG4b F GTCCAGGTAAGGAGCACAA  
 OAL3035 vgrG4b R TTCGATAGTCAGCGCTGTG  
 OAL2136 tle4(tpIe) F CAATCTGTTTGTGCGAAGA  
 OAL2137 tle4(tpIe) R GCTGACGATGTTTCCAGTC  
 OAL3038 tle3 F TCTACTACCGCGAGATTC  
 OAL3039 tle3 R CCGCGTCTCTTGATATAT  
 OAL3044 PA14\_69520 F CGAATACCGCATGACAGAG  
 OAL3045 PA14\_69520 R GGTACGGGGAAAGCCAGTT  
 OAL3032 pldB(tle5b) F ACATCAAGCCGCTGATCAAT  
 OAL3033 pldB(tle5b) R AAGCCCAAGTGTGATGTT  
 OAL3036 pldA(tle5a) F CCTCCAGAAAGCACTCA  
 OAL3037 pldA(tle5a) R AAGAGTGGACCCCTGAT  
 OAL1029 tssB1 F GCCTCAAGTCCAGCAAGCT  
 OAL1030 tssB1 R GAAGTCTCCATGCTCGAA  
 OAL511 tssA2 F GGTGACCTGGCCCTCTAC  
 OAL512 tssA2 R GATGATCTCCACCAATGTC  
 OAL3048 tssB3 F GTACCGACGACAGCTGGAC  
 OAL3049 tssB3 R GGAGCTCTCTCTCGATG  
 OAL3028 hcp3 F GATCATGCTCTTACGCTCT  
 OAL3029 hcp3 R TTGTGGAAGTTCAGCGACG  
 OAL3046 tssA3 F TGGAAAGTCTGCTGGAACC  
 OAL3047 tssA3 R CGAGCTCTCTGCTGCTCT  
 OAL4035 tssA1 F CTGCTGCAGACACCTC  
 OAL4036 tssA1 R GATAGACGCCCTCCACAT  
 OAL4037 tssB2 F GCCAAGAGAGGCTCGGTAG  
 OAL4038 tssB2 R CTTCAACGGGATGTTGATT  
 OAL3022 vgrG3 F CGCAGAGTCTGGATGTAAG  
 OAL3023 vgrG3 R CCACCTGAGCTGATGTT  
 OAL820 rpoD F AGCCGTCGACAGGATAC  
 OAL821 rpoD R TCCCATGCTGTCATGATG

**Microscopy plasmids**  
**pME6032tssB1-venus**  
 OAL2946 5' tssB1 GCGAGCTGATGGAAGCACTACCAC  
 OAL2947 3' tssB1 GGGGTACCGCGCTCGGCTGCTGTC  
**pN105tssB2-CFP**  
 OAL3403 5' tssB2 GGGCCCGGGTCAATCTCAAGGAGAAAAGCC  
 OAL3404 3' tssB2 TCCTCTCTGCTGCTGCGGGCTCTGGGAGGGG  
**pN105tssB3-CFP**  
 OAL3405 5' tssB3 GCGCCCGGGTTCATGGAGTCAAGCCG  
 OAL3406 3' tssB3 TCCTCTCTGCTGCTGCGGGCTGCTGCTCGCC  
 OAL3439 CFP\_linker\_f\_new GCAGGACGAGGAGGAGGATGGTGAAGGGGCA  
 OAL3440 CFP\_linker\_r\_new GCGCGTCTAGATTACTTATACAGCTGCTCATGCC  
**pMMB67HtssB3-GFP**  
 OAL3260 tssB3\_3'GFP\_F GCATCGGAGTCAAGCCG  
 OAL1586 5'3'GFP GCAGGACGAGGAGGAGGATGCTGTAAGGCGAAGAA  
 OAL1687 3'3'GFP CCTAGTCACTACTATACAGCTC

tssA2R promoter region to test AmrZ binding  
 tssB3R promoter region to test AmrZ binding  
 tssB3R promoter region to test AmrZ binding  
 algB negative control for AmrZ binding assay longer fragment  
 algB negative control for AmrZ binding assay longer fragment  
 algB positive control for AmrZ binding assay longer fragment  
 algB positive control for AmrZ binding assay longer fragment  
 Use with OAL2985 to amplify a 75 bp fragment with 1 putative amrZ binding site  
 Use with OAL2986 to amplify a 94 bp fragment with 2 putative amrZ binding site  
 Use with OAL2988 to amplify a 82 bp fragment with 1 putative amrZ binding site  
 Use with OAL2989 to amplify a 110 bp fragment with 1 putative amrZ binding site  
 Use with OAL3088 to amplify a 200 bp fragment with 1 putative amrZ binding site  
 Use with OAL2991 to amplify a 200 bp fragment with 1 putative amrZ binding site  
 qRT-PCR (PA14\_44900/PA1511)  
 qRT-PCR (PA14\_44900/PA1511)  
 qRT-PCR vgrG2b (PA14\_03220/PA0262)  
 qRT-PCR vgrG2b (PA14\_03220/PA0262)  
 qRT-PCR vgrG6 (PA14\_69550)  
 qRT-PCR vgrG6 (PA14\_69550)  
 qRT-PCR vgrG5 (PA14\_67230/PA5090)  
 qRT-PCR vgrG5 (PA14\_67230/PA5090)  
 qRT-PCR vgrG4b (PA14\_18985/PA3486)  
 qRT-PCR vgrG4b (PA14\_18985/PA3486)  
 qRT-PCR tle4 (PA14\_44910/PA1510)  
 qRT-PCR tle4 (PA14\_44910/PA1510)  
 qRT-PCR tle3 (PA14\_03200/PA0260)  
 qRT-PCR tle3 (PA14\_03200/PA0260)  
 qRT-PCR putative toxin next to vgrG6 in PA14 (PA14\_69520)  
 qRT-PCR putative toxin next to vgrG6 in PA14 (PA14\_69520)  
 qRT-PCR pldB (PA14\_67220/PA5089)  
 qRT-PCR pldB (PA14\_67220/PA5089)  
 qRT-PCR pldA(tle5a) (PA14\_18970/PA3487)  
 qRT-PCR pldA(tle5a) (PA14\_18970/PA3487)  
 qRT-PCR tssB1 (PA14\_01010/PA0083)  
 qRT-PCR tssB1 (PA14\_01010/PA0083)  
 qRT-PCR tssA2 (PA14\_43050/PA1656)  
 qRT-PCR tssA2 (PA14\_43050/PA1656)  
 qRT-PCR tssB2 (PA14\_34070/PA2365)  
 qRT-PCR tssB2 (PA14\_34070/PA2365)  
 qRT-PCR hcp3 (PA14\_34030/PA2367)  
 qRT-PCR hcp3 (PA14\_34030/PA2367)  
 qRT-PCR tssA3 (PA14\_34140/PA2360)  
 qRT-PCR tssA3 (PA14\_34140/PA2360)  
 qRT-PCR tssA1 (PA0082/PA14\_00990) 100 bp  
 qRT-PCR tssA1 (PA0082/PA14\_00990) 100 bp  
 qRT-PCR tssA1 (PA1656/PA14\_43050) 96 bp  
 qRT-PCR tssA1 (PA1656/PA14\_43050) 96 bp  
 qRT-PCR vgrG3 (PA2373/PA14\_33960) 114 bp  
 qRT-PCR vgrG3 (PA2373/PA14\_33960) 114 bp  
 qRT-PCR rpoD (housekeeping gene)  
 qRT-PCR rpoD (housekeeping gene)

Cloning tssB1 into pME6032-Cterm-venus  
 Cloning tssB1 into pME6032-Cterm-venus  
 To amplify tssB2 (PA1657) with a linker to generate overlapping product with CFP linker  
 To amplify tssB2 (PA1657) with a linker to generate overlapping product with CFP linker  
 To amplify tssB3 (PA2365) with a linker to generate overlapping product with CFP linker  
 To amplify tssB3 (PA2365) with a linker to generate overlapping product with CFP linker  
 Generation of C-term CFP fusion with linker using pSEVA237C as template  
 Generation of C-term CFP fusion with linker using pSEVA237C as template  
 5' tssB3 coding region to fuse with sfGFP  
 5' primer sfGFP with linker  
 3' primer sfGFP
